# Supplementary material for: Genetic Foundations of Nellore Traits: A Gene Prioritization and Functional Analyses of Genome-Wide Association Study Results
Source: Preprints.org preprint supplement (doi:10.20944/preprints202408.1101.v1), 2024-08-14
Supplement: Supplementary file 1 [file Table S1.xlsx]

## Sheet: Sheet1
TableS1. Keyword combinations used to search database
Trait Groups	Search Terms
Reproduction	(nel$ore OR zebu) AND (Cattle OR Livestock) gene*OR loc* OR GWAS OR genome wide association analys?s OR QTL reproduc* OR scrot* OR calv* OR wean* OR hormon* OR test* OR puberty OR sexual precocity OR gestation
Carcass	(nel$ore OR zebu) AND (Cattle OR Livestock) gene*OR loc* OR GWAS OR genome wide association analys?s OR QTL carcas* OR r?b eye area OR r?mp fat thickness OR intra* fat OR Marb* OR tender* OR meat color OR Backfat thickness
Growth	(nel$ore OR zebu) AND (Cattle OR Livestock) gene*OR loc* OR GWAS OR genome wide association analys?s OR QTL Res* feed intake OR wean?ng OR birth OR weight OR efficiency OR Dry matter intake OR conversion
Morphological	(nel$ore OR zebu) AND (Cattle OR Livestock) gene*OR loc* OR GWAS OR genome wide association analys?s OR QTL struc* OR Muscl* OR Muscu* longissimus muscle area OR precocity OR malformation OR conformation
