# Supplementary material for: Genetic Foundations of Nellore Traits: A Gene Prioritization and Functional Analyses of Genome-Wide Association Study Results
Source: Preprints.org preprint supplement (doi:10.20944/preprints202408.1101.v1), 2024-08-14
Supplement: Supplementary file 2 [file Table S2.xlsx]

## Sheet: Sheet1
Table S2. Final scientific publication used in the study which includes Genomic regions associated with the Trait Group
Paper	Trait Group	Traits	Genome Assembly	Chromosome	Coordinate (BP)	References
1	Reproduction	Scrotal Circumference	Umd 3.1	19	36581831	Irano et al.,[11]
				4	49122806
				13	63652476
				8	73488791
				11	30138981
				13	38073998
				14	16576363
				19	48297541
				22	17437815
				23	14372298
		Early Pregnancy		5	9470852
				5	16507515
				6	9990814
				7	Deleted in new
				7	40269919
				14	21349868
				18	#Partially deleted in new
				21	Deleted in new
				21	60642803
				27	2415617
2	Reproduction	Scrotal Circumference	Umd 3.1.1	X	31199600	Hermisdorff et al.,[83]
				X	114024187
				X	16618839
				X	16685798
				X	16699876
				X	25665080
				X	31478728
				X	81369368
				X	18412704
				X	18478215
				X	18520364
				X	102553425
				X	102416134
				X	102378544
3	Reproduction	Scrotal Circumference	UMD v3.1	4	30255222	Utsunomiya et al.,[84]
				6	5843702
				7
				10	28292803
				10	35336626
				14	19943215
				14	23331543
				18	34683102
				21	1206861
4	Reproduction	Age at puberty	UMD 3.1	1	56330367	Stafuzza et al.,[85]
				1	84453301
				1	72146352
				1	66708817
				2	3649891
				2	64731387
				3	95608036
				4	111454608
				4	30653861
				5	32786669
				5	7537087
				9	12385981
				9	14867104
				10	Deleted in new
				11	66476899
				12	32339229
				15	40647638
				18	26615602
				19	10119158
				19	53706089
				19	43639326
				20	70708021
				20	1879943
				25	2380092
				26	17300467
				29	28390893
5	Growth	Birth weight (Maternal genetic effect)	UMD v3.1	3	38450067	Carvalrho et al.,[86]
				4	99717158
				6	17595661
				6	42658458
				6	100740079
				10	22583272
				12	3487671
				13	7839820
				14	29744328
				14	47356354
				16	57333315
				17	12667206
				21	35261571
				21	Deleted in new
				22	41277749
				26	47491745
		Birth weight (Direct additive effect )		1	135401037
				3	72373808
				6	19556201
				6	42658458
				7	73253798
				14	18010466
				16	47602515
				21	35266924
		Weaning weight W210(Direct Additive effect)		1	134058899
				3	6169179
				6	17926128
				8	66977318
				14	20487756
				15	77927738
				16	5999157
				17	51811712
				26	43191579
				28	33210194
		Weaning weight W210 (Maternal genetic effect )		3	6169179
				3	118949342
				4	30903995
				6	17919514
				14	73420621
				15	77927738
				19	30160982
				23	21812290
		Yearling weight (W450)		7	6449405
				12	23726962
				13	18457615
				14	4578147
				20	22441167
				20	24573674
		Adult cow weight		1	139911204
				2	5822435
				4	92449042
				4	111896702
				8	28314675
				9	74592821
				13	19403413
				14	5411183
				21	31379324
				22	25030313
				23	20296846
				28	32669434
6	Growth	Dry Matter Intake (HDimp)	UMD v3.1	4	74451925	Santana et al.,[87]
				8	28744432
				14	42784674
		Residual Feed intake (50k)		8	614304
		HDimp		21	69453286
7	Growth	Residual Feed intake	UMD 3.1	2	20754793	Brunes et al., [88]
				2	120719761
				3	53876058
				5	70354998
				6	72224958
				11	84459771
				11	30298280
				16	74063687
				19	42731518
				20	7504597
				20	66262405
				21	21737937
				24	52989626
		Dry matter Intake		2	21276284
				2	120719761
				5	33992612
				10	7093421
				10	3402980
				12	18729993
				14	20985229
				14	22484080
				14	20078440
				19	42834052
				20	7504597
				21	21737937
				21	9199067
				23	23169570
				29	23782498
		Feed Efficiency		6	72224958
				7	24180906
				9	33280295
				9	12904330
				9	34444091
				10	6745258
				11	84649426
				14	15490614
				14	18578406
				14	17433489
				14	19844094
				14	14346648
				16	75561635
				16	74063687
				16	72248067
				17	46145094
				20	7792845
				20	6215633
				24	55945667
				24	55009888
				24	52873584
		Feed conversion ratio		6	72224958
				7	24180906
				9	33280295
				9	12904330
				9	34444091
				10	6745258
				11	84649426
				14	15490614
				14	18578406
				14	17433489
				14	19844094
				14	14346648
				16	75561635
				16	74063687
				16	72248067
				17	46145094
				20	7792845
				20	6215633
				24	55945667
				24	55009888
				24	52873584
		Residual Bodyweight Gain		7	24180901
				9	12904329
				9	16001468
				11	84649424
				14	15490611
				14	19844092
				14	17433487
				14	18578402
				14	20985227
				14	20365431
				14	14346646
				14	22461744
				14	22076004
				14	22739520
				14	24272505
				14	1074253
				14	23431622
				14	23028389
				16	47491891
				17	68658514
				18	18091351
				18	16788975
				24	55945666
				24	55009885
				24	52873581
				29	13737706
		Residual Intake & Body weight gain		1	95618291
				1	129029108
				2	21276281
				2	120719734
				2	20337781
				5	99216947
				5	34185553
				6	72224956
				9	33280294
				11	30298278
				14	18578402
				14	19844094
				14	20534467
				14	15490611
				14	22936127
				14	23329373
				14	14346646
				14	22420389
				14	17433487
				14	22727074
				14	21915134
				19	6135339
				19	42731518
				20	7454062
				20	67235122
				21	21737937
				30	Deleted in new
8	Carcass	Marbling	UMD3.1	5	31596309	Magalhaes et al.,[89]
				5	31314215
				5	31355381
				5	31384617
				5	31418086
				5	31436113
				5	31456908
				5	31462944
				5	31486794
				5	31500937
				5	31935227
				5	31525890
				5	31541798
				5	31555920
				5	31609001
				5	31693309
				5	31732008
				5	31747770
				5	31782501
				5	31836819
				5	31782501
				5	31836819
				5	31921470
				25	2273100
				25	2283017
				25	2324687
				25	2879805
				25	2585843
				25	2355831
				25	2373807
				25	2378598
				25	2684504
				25	2382487
				25	2432095
				25	2434982
				25	2857208
				25	2749298
				25	2438399
				25	2440598
				25	2442998
				25	2842307
				25	2448510
				25	2481690
				25	2740932
				25	2542775
				25	2565505
				25	2579814
				25	2890627
				5	68711069
				5	68418276
				5	68532711
				5	68567072
				5	68727314
				5	68668125
				5	68845697
				15	54025729
				15	54105699
				15	54660882
				15	54184671
				15	54260709
				15	54607395
				15	54346463
				15	54328275
				15	54234985
				15	54346463
				15	54363479
				15	54537312
				15	54401710
				15	54462694
				15	54515854
				15	54811587
				15	54596107
				15	54743286
				5	75797274
				5	75896136
				5	75920730
				5	76004025
				5	76110120
				5	76359675
				16	42930523
				16	42955114
				16	43037498
				16	43115745
				16	43128355
				16	43141501
				16	43165967
				16	43767614
				16	43553067
				16	43665902
				16	43261714
				16	43335404
				16	43795800
				16	43440287
				16	43575501
		Tenderness		14	21189346
				14	21413043
				14	22002064
				14	21507544
				14	21971682
				14	21608753
				14	21727124
				14	21877464
				14	21929637
				10	59712137
				10	59768066
				10	59786269
				10	60043621
				10	59823067
				10	59924596
				10	59915369
				10	60327439
				10	59993678
				10	60706908
				5	31185182
				5	31314215
				5	31355381
				5	31384617
				5	31418086
				5	31436113
				5	31456908
				5	31462944
				5	31486794
				5	31500937
				5	31921470
				5	31935227
				5	31525890
				5	31541798
				5	31555920
				5	31609001
				5	31693309
				5	31732008
				5	31747770
				5	31782501
				5	31836819
				14	22796789
				14	23052176
				14	23082919
				14	23207235
				14	23278953
				14	23299700
				14	23331544
				21	64242337
				21	64445806
				21	64647016
				21	64807387
				21	64562612
				21	64682663
				7	96102491
				7	96186443
9	Reproduction	Age at first calving	UMD 3.1	9	85306223	Costa et al.,[90]
				14	29154723
				25	5073972
				10	99620143
				9	86475610
				13	36732159
				25	1324603
				13	11987475
				20	10223692
				4	72306645
				10	93006685
				9	85290929
				13	10299632
				14	52572361
				22	41262942
				23	29344937
				14	29299916
				9	85789493
				10	93007528
		Heifer Rebreeding		10	78206073
				9	85306223
				14	29154723
				3	58156610
				16	33669683
				10	99630406
				13	10299632
				13	36735510
				25	5073972
				14	52572361
				27	13263066
				16	33655657
				20	10228626
				22	41262942
				23	25400629
				20	10235276
				13	11987475
				13	36732159
				27	44241166
				14	29299916
				9	85789493
				13	11991316
				9	86475610
				20	10223692
				27	4215793
				8	76508154
				9	85290929
				10	99620143
				7	90441022
				3	13516552
				4	72306645
				10	93006685
				18	42331967
				10	93007528
				25	1324603
				2	66267918
				20	12482176
				11	25254437
				3	6826357
				4	65130548
				21	62670367
				23	29344937
10	Reproduction	Heifer Rebreeding	UMD 3.1	4	ommited due to change in chromosome	Pinto de Melo et al.,[91]
				6
				6	Deleted in new
				10	87491908
				11	70514743
				11	71510670
				11	72511289
				11	73508450
				13	1601009
				14	37371733
				15	50664785
				16	49233458
				17	48472366
				17	63248285
				17	68364989
				20	3595799
				20	14544384
				21	42080963
				26	42127269
				29	13424380
		Calving at 53 months		1	18008730
				3	6507123
				8	68004188
				9	39023060
				10	100433251
				11	72511289
				14	78138481
				15	35963957
				15	56716470
				16	49233458
				16	57100819
				17	68364989
				18	17434005
				18	18414203
				23	25750979
				24	18193477
				26	18635077
				27	10508900
				28	14399796
				28	44117411
11	Reproduction	Age at first calving	UMD 3.1	2	6344918	Mota et al.,[92]
				8	103413798
				9	39686955
				9	41990373
				9	43794861
				14	19068162
				14	22796054
				14	20512545
				14	21509453
				14	22516504
				14	25017434
				14	26647438
				14	30052748
				14	1616414
				14	34344315
				16	43552290
				16	67239524
				17	55534872
12	Carcass	Carcass fatness	ARS-UCDv1.2	1	64665865	Martins et al.,[93]
				2	64600046
				2	55842077
				5	62799058
				6	36761762
				7	53992878
				8	109956074
				10	80244585
				10	31097781
				13	60476456
				14	46389381
				26	27716373
				27	14392927
13	Reproduction	Age at first calving	ARS-UCDv1.2	1	10387880	Regatieri et al.,[94]
				4
				6	7869852
				11	61007558
				17
				21	64453529
				22	44173449
		Early pregnancy		1	10387880
				21	37876379
				21	64453529
				22	44173449
14	Morphological	Visual scores for conformation	ARS-UCD1.2.	3	3047394	Machado et al.,[95]
				3	3230985
				3	3310455
				3	3388511
				3	3503551
				5	90311684
				5	90723786
				14	23947554
				14	24384934
				14	24607624
				14	24663353
				14	25168944
				14	25877319
				14	26235546
				14	26468050
				14	36103479
				20	61673877
				21	24496757
				21	24606000
				21	24882519
				21	24940497
				21	25045701
				21	25211767
				27	23593853
				29	17741082
				29	17839681
		Visual scores for Precocity		2	48614759
				2	117085130
				2	117532536
				2	117858271
				3	21585508
				3	21687750
				3	21785097
				3	21892505
				3	22052834
				8	45363826
				8	45511113
				8	45727441
				13	2100214
				13	2537681
				13	7849198
				23	11353072
				23	11413035
				23	11578788
				23	11880611
				23	12277181
				23	25093910
				23	25168509
				23	25252635
				23	25456012
				23	25605531
		Visual scores for Muscularity		1	60287198
				1	60490837
				7	37036449
				7	37883437
				7	37956126
				7	38121241
				7	38319090
				7	38348960
				7	38398170
				9	91158244
				9	91517572
				9	91697825
				9	91911557
				16	34093345
				16	34435509
				21	34677009
				21	34668899
				21	34799547
				21	35107934
15	Reproduction	Stayability	UMD 3.1.1	1	63240874	Teixeira et al.,[96]
				2	49546646
				5	48159255
				5	76659533
				5	102612751
				6	70113546
				9	22658459
				20	22064398
				X	118627994
				X	131743517
16	Reproduction	Testicular hypoplasia	ARS-UCD1.2	14	6146803	Lima silva et al.,[97]
				1	116189356
				11	4784490
				1	158033248
				11	32916600
				7	33642493
				13	2634288
				9	59304243
				28	10079088
				24	10755750
				27	33161208
				20	1951646
17	Reproduction	Testiscular hypoplasia	UMD3.1.1	4	117173015	Neves et al.,[98]
				25	6982181
				5	97463675
				1	63874723
				23	32704327
				5	94700176
				25	7011111
				9	5339004
				3	91464770
				9	22553726
				4	99913820
				22	56403928
				23	32750192
				4	75577386
				1	132093982
18	Reproduction	Scrotal circumference 365 days	UMD3.1.1	7	97394166	Sbardella et al., [99]
				27	4601448
				27	4905922
		Scrotal circumference at 450 days		4	92683921
				5	29597524
				17	30435923
				19	16427547
				23	31145836
				26	2660220
		Gestation length		1	88878093
				13	74907482
		Age at first calving		3	70891231
				11	10618909
				11	21283123
				12	19780666
				25	40005606
	Growth	Accumulated productivity		1	11926341
				3	7771890
				6	6777436
				6	92601980
				6	92649564
				9	66709017
				16	9249587
				16	8801862
				20	19184590
				25	30821674
	Reproduction	Heifer Early calving till 30 months		9	55624117
				10	63690088
				11	11345617
				11	11373324
				11	11389120
				11	11424562
				11	11458972
				11	11524218
				11	16582045
				11	67824733
				13	63601791
				13	63665250
				13	35079670
				13	63817526
				13	63897244
				14	49205375
				14	26584220
				14	49464975
				25	3945572
				25	17569222
				25	13507767
				25	18577164
				25	18786707
				25	40178975
				27	35552835
		Stayability		1	33724955
				3	42869109
				4	55989954
				4	78501088
				4	43341582
				9	2348127
				9	4388931
				11	1457960
				13	7241656
				15	15042937
				26	25371868
				27	23144486
19	Carcass	Meat Color	UMD3.1	5	47242192	Marín-Garzón et al., [100]
				6	3351603
				2	106663703
				13	7801689
				5	102803014
				5	74023481
				9	88304182
				13	39840776
				9	74452300
				18	5328439
				6	73467103
				6	59719050
				3	29996500
				6	65849305
				24	56153187
				28	40605406
				11	16810410
				6	22026414
				4	14999557
				7	75496586
				26	42686340
				15	71758045
				4	7360822
				4	60557392
				14	77662051
				23	31911934
				3	65542409
				23	8937695
				3	37236883
				18	5420004
				18	30411341
				18	32106919
				15	71758045
				6	66229047
				2	106511019
				26	42613940
				6	69842156
				5	46908056
				12	77405447
				14	32756551
				6	21639659
				18	37247038
				1	156256577
				18	35307065
				7	23267227
				18	30202842
				23	1266893
				1	99971439
				18	4716981
20	Morphological	Feet and legs malformation	ARS-UCD1.2	27	39340796	Lima Silva et al., 2023 [21]
				3	119437622
				3	119458549
				3	119488795
				3	119532823
				3	119579897
				3	119664382
				3	119673041
				22	55214310
				22	55441740
				29	35060361
				14	46321065
				23	21025805
				23	62354170
				18	62400077
				18	62414532
				18	62451549
				18	62468025
				18	62463092
				18	62511927
				18	62532811
				18	62547412
				18	62582912
				20	26195193
				5	6233700
				5	6290707
				5	6438363
				5	6463149
				23	9094813
				23	9208959
				23	9254908
				23	9285068
				23	9347080
				6	30715733
				6	31579451
				2	121396814
				2	121453177
				2	61675824
21	Growth	Feedlot Average daily gain	UMD v3.1	3	85296612	Santana et al., [101]
				3	85300868
				10	79469756
				3	85329724
				3	85385895
				3	85390563
				10	79516384
				6	61510174
				10	79448777
				3	85417672
22	Carcass	Rib Eye Area	umd v3.1	1	128999464	Santana et al., [102]
				1	128999464
				1	128999464
				1	128999464
				1	128999464
				1	128999464
				1	128999464
				1	128999464
				1	128999464
				1	128999464
				3	45544533
				3	45544533
				4	42286642
				5	96452336
				5	96452336
				5	96452336
				5	113266103
				5	113266103
				5	113266103
				5	113364643
				5	113364643
				5	113627444
				5	113627444
				5	115772278
				5	115872066
				8	3730243
				8	Deleted in new
				8	Deleted in new
				12	15749797
				12	75729257
				17	27982274
				17	29278278
				17	71816622
				20	39162655
				21	47468417
				21	47468417
				28	Deleted in new
		Backfat thickness		2	113009683
				2	113109123
				4	70947940
				7	82392326
				12	23476533
				12	23476533
				12	23476533
				14	11088559
				14	13183904
				14	13283940
				16	22907234
				17	56852814
				20	56724595
				20	69059671
				22	57542635
				22	57641251
				27	15063132
				28	9553612
		Rump fat thickness		1	100597608
				1	107448196
				1	108645652
				1	108645652
				1	108645652
				1	108645652
				1	108745617
				1	108745617
				1	110130152
				1	110130152
				1	110130152
				1	110230353
				1	110230353
				1	111703378
				3	11163616
				3	83157210
				4	47226595
				4	47226595
				11	101178225
				14	13183904
				14	13183904
				14	13183904
				14	13283940
				14	43441900
				16	19713444
				16	23902229
				20	20391642
				20	21090860
				20	21584824
				20	49609213
				20	61805564
				20	64165876
				22	57444160
				27	29318477
23	Reproduction	Preweaning calf mortality rate	UMD3.1.1	11	56183446	Marin-Garzon et al., [103]
				16	30555803
				15	19301432
				10	42859325
				18	17409738
				2	128207000
				14	78455010
				3	96500295
				19	58253861
				8	102879940
				5	23708303
				5	57580549
				2	128148779
				9	77203093
				23	49739083
				5	87481617
				9	74432028
				9	2281660
				2	78814287
24	Carcass	Hot Carcass weight	UMD 3.1	28	763584	Espigolan et al., [104]
				14	3928258
				13	60267417
				13	61983592
				13	62218337
				13	62235830
				13	62254306
				13	62267226
				13	66468727
				13	66488686
				13	66491102
				13	66518804
				13	66558999
				13	66715848
				13	66749735
				13	66762855
				13	66768239
				13	66774860
				13	66804246
				13	66808307
				13	67005123
				13	67010728
				13	67020567
				13	67024837
				13	67084628
				13	67188782
				13	67202419
25	Growth	Feed efficiency related traits	ARS-UCD1.2	1	95225000	Mota et al., [105]
				2	104600000
				3	79915000
				4	71365000
				5	66490000
				7	16070000
				8	67265000
				11	74325000
				14	23665000
				15	56425000
				18	35395000
				18	50295000
				21	7885000
				29	49585000
26	Carcass	Backfat thickness	ARS-UCD1.2	1	41676148	Martins et al., [106]
				1	90144751
				4	38593514
				4	92756396
				4	93279456
				5	119109399
				7	50294223
				8	1621562
				8	1924975
				17	47455470
				19	22246988
				21	21547146
				22	10857060
				29	32041119
		Rump fat thickness		1	64553010
				1	64850769
				2	56070717
				5	62766947
				6	36685901
				7	54039237
				8	10966070
				10	80218422
				11	46733681
				14	46389381
				18	16818252
				19	56114065
				22	43488896
				26	27729751
				27	14392927
27	Growth	Residual body weight gain	UMDv 3.1	12	16290233	Santana et al., [107]
				2	66779583
				17	30542032
				17	30542403
				8	21849103
				12	16291964
				12	16295441
				17	30544124
				17	30548693
				12	16289868
28	Carcass	Rib eye area	ARS-UCD1.2	20	10300000	Arikawa et al., [108]
				22	5265000
				10	4330000
				3	116210000
				4	95890000
				9	79740000
				13	73020000
				14	53040000
				12	20095000
				5	114640000
		Backfat thickness		13	4810000
				20	56165000
				1	145615000
				3	117340000
				29	42225000
				17	66495000
				6	11965000
				18	5470000
				11	56535000
				6	36120000
		Hot carcass weight		14	22990000
				23	8770000
				1	149610000
				17	11830000
				11	89955000
				5	63365000
				1	153960000
				3	73890000
				22	16885000
				5	21410000
		Shear force tenderness		7	95930000
				5	9120000
				7	100640000
				10	96220000
				2	40030000
				25	17380000
				1	147150000
				9	86970000
				19	22080000
				25	29520000
		Marbling		15	7190000
				4	105950000
				20	35790000
				10	70300000
				13	61570000
				12	12130000
				11	90150000
				7	65130000
				4	36165000
				11	76675000
		Intramuscular fat content		8	74740000
				13	76220000
				13	82250000
				28	27180000
				8	64920000
				8	49240000
				12	54450000
				9	20505000
				8	68565000
				10	44990000
29	Reproduction	Age at first calving	UMD v3.1	1	23415071	Mota et al., [109]
				1	23417063
				1	23524493
				1	23513768
				1	23530218
				1	23357166
				1	23362635
				1	23436633
				1	23516232
				1	23522627
				1	23512727
				2	104342527
				2	104333231
				2	104335517
				2	104336417
				2	104345843
				2	104334000
				2	104346996
				6	18234398
				6	18238580
				6	18283330
				14	23264774
				14	23304037
				14	23313248
				14	23246004
				14	23144222
				14	23220345
				14	23178393
				14	23392752
				15	34807346
				15	35105096
				17	48809222
				17	48805859
				17	48620020
				17	48679485
				27	32259950
				27	31935787
				27	31963909
				2	104327260
				2	104327260
				2	104346996
				2	104324796
				2	104334000
				2	104352489
				2	104335517
				2	104326799
				3	2065193
				3	2062805
				3	8324707
				3	8384307
				5	9436000
				5	10704940
				5	9427175
				5	10808250
				14	23264774
				14	23392752
				14	23398807
				14	23235075
				14	23220345
				14	23223696
				14	23178393
				14	23402733
				14	23349424
				14	23144222
				14	23373700
				14	23246004
				14	23229588
				14	23359943
				18	4753305
				18	3823390
				18	4849376
				18	3806882
				18	4768451
				18	3784530
				18	4795425
				18	2986137
				18	2987064
				18	2984539
				18	3039492
				2	104659010
				2	104342527
				2	104351463
				2	104335517
				2	104409844
				2	104661942
				2	104336417
				3	8335669
				3	8360977
				3	8324707
				3	8384307
				5	10785487
				5	10796315
				5	9436000
				5	10766833
				5	10808250
				5	10802561
				5	10704940
				14	23264774
				14	23398807
				14	23392752
				14	21735027
				14	23220345
				14	23235075
				14	23313248
				14	23304037
				14	23223696
				14	23165502
				14	23402733
				14	23144222
				14	23178393
				14	23246004
				14	23349424
				14	23359943
				14	23229588
				14	23373700
				18	4753305
				18	3098282
				18	3823390
				18	3806882
				18	4768451
				18	3039492
				18	4795425
				18	3784530
30	Growth	Dry Matter intake	UMD3.1	4	17006522	Olivieri et al.,[110]
				9	33574234
				11	39145697
				15	45369534
				18	29896389
				18	58657868
				18	61555542
				22	22895629
		Average Daily Gain		1	75388088
				3	84453745
				5	14925658
				5	15920578
				5	17934178
				6	114190587
				10	13044933
				12	21984863
				12	24977374
				14	54835714
				15	Deleted in new
				16	27297180
				17	56744005
				18	49724549
				21	57410292
				25	22732441
				27	33296045
		Feed efficiency		1	99202908
				4	27026282
				7	76863527
				8	76646713
				8	102295234
				10	3055869
				11	2027132
				11	10016821
				18	1968097
				18	59708420
				20	71863818
				21	5834108
				22	31882603
				27	17930822
		Residual Feed Intake		1	99202908
				1	121032024
				4	105161548
				4	118216463
				7	89641870
				8	41716758
				8	102295234
				8	102295234
				10	67768323
				18	10995067
				21	17620093
				24	58494356
31	Carcass	Intramuscular fat content	ARS-UCD1.2	23	15000000	Silva Vignato et al.,[111]
				7	2000000
				21	22000000
				7	81000000
				1	75000000
				20	62000000
				1	67000000
				13	13000000
				19	54000000
				3	108000000
				10	37000000
		Backfat thickness		9	4000000
				1	63000000
				9	46000000
				5	104000000
				17	18000000
				9	55000000
				7	3000000
				13	52000000
				7	96000000
				21	23000000
32	Reproduction	Age at first calving	ARS-UCD1.2	18	8528108	Dubon et al.,[112]
				21	34374388
				2	79703266
				24	804609
				1	82676311
				5	12906134
				12	68198249
33	Reproduction	Early Puberty	UMD v3.1	5	78272293	Nascimento et al.,[113]
				6	57394078
				9	8235057
				10	33722075
				22	10379428
				22	10379428
34	Reproduction	Early/Heifer pregnancy	UMD 3.1	5	78272293	Junior et al., [114]
				5	57394078
				5	8235057
				14	33722075
				18	10379428
				14	10379428
		Antral follicle count		22	14863449
				11	68571210
				8	7476632
				16	75356578
				14	25314163
				2	118817496
				15	11692744
35	Carcass	Rib Eye Area	ARS UCD 1.2	1	139000000	Reis et al., [115]
				1	143000000
				2	103000000
				8	59000000
				9	27000000
				11	4000000
				11	85000000
				16	67000000
				17	67000000
				20	39000000
		Subcutaneous fat thickness		1	155000000
				2	105000000
				4	117000000
				6	26000000
				6	78000000
				11	95000000
				12	2000000
				12	39000000
				12	41000000
				17	47000000
				24	31000000
		Shear force at 7 days ageing		2	57000000
				5	68000000
				6	99000000
				11	28000000
				24	48000000
				27	7000000
		intramuscular fat		6	68000000
				7	59000000
				8	103000000
				17	9000000
				18	16000000
				24	61000000
				29	12000000
36	Reproduction	Antral follicle	ARS-UCD1.2	26	45719359	Grigoletto et al.,[116]
				1	109166294
				14	68646711
				1	65048952
				14	4988386
				6	13997315
				8	87055272
				2	16971343
				2	16880068
				26	39790486
				28	596158
				4	77327887
				6	14021268
				11	48581171
				1	157913185
				29	23599007
				21	62343514
				4	10678489
		Anti-Mullerian Hormone		5	97255170
				7	13352212
				1	143119366
				5	23900458
				3	26917309
				1	109176290
				8	75879725
				22	26452955
				25	22079850
				1	64994105
				10	11065691
				18	7181965
				11	6723043
37	Carcass	Meat Tenderness	UMD 3.1	2	35785844	castro et al.,[117]
				3	61782259
				3	61759607
				3	44268510
				3	46927873
				6	104852060
				7	3847950
				8	42175486
				8	42310680
				8	39982751
				10	52483852
				10	56752206
				13	5341033
				13	5339509
				15	61323863
				16	78991296
				16	69762692
				16	69751150
				17	36454604
				17	36445184
				17	36408378
				17	36453003
				18	51454437
				18	757186
				19	30530895
				19	30534753
				20	69715847
				20	58942080
				20	58943049
				20	64330372
				20	62797813
				21	40464721
				21	40309683
				21	40302085
				21	40343860
				21	40449664
				25	30851526
				25	18310615
				25	18306940
				27	8444423
				27	10768728
				27	8446307
				27	10789608
				27	8409039
				28	44708628
				28	41982822
38	Reproduction	Stayability	ARS-UCD1.2	1	65914086	Silva et al.,[118]
				2	119226227
				2	135811589
				4	35262138
				6	13273327
				6	15255849
				6	40988207
				6	48536747
				6	63824422
				6	76631221
				6	83956608
				7	30887747
				7	40401610
				7	71263589
				7	106950086
				8	46088674
				8	78928518
				9	41590724
				9	43532307
				9	58691345
				9	64579725
				10	6134925
				10	46266252
				10	58371102
				11	4411922
				11	54242658
				11	82745275
				11	14366132
				11	18506805
				12	61064047
				13	18440802
				13	30553068
				13	73172170
				13	75480491
				14	31142785
				14	7094406
				18	4167393
				18	59877736
				19	43876078
				20	25548715
				20	34482873
				20	35669691
				20	41926891
				20	64126546
				27	21594890
				28	37677008
				28	40520246
39	Reproduction	Age at first calving	ARS-UCD1.2	SNP 1		Alves et al.,[119]
				3	1207469
				3	633619
				3	261913
				3	981696
				3	1135161
				3	1207469
				5	19823030
				5	19823030
				5	19823030
				5	19823030
				5	19823030
				11	2811617
				11	4969068
				SNP2
				11	4969068
				11	4969068
				11	4969068
				11	4969068
				11	4969068
				11	2811617
				18	63426736
				21	5004507
				21	1164298
				21	1195551
				21	1940618
				24	55609449
				24	55609449
40	Morphological	Feet and leg conformation	UMD3.1	8	63543387	Vargas et al.,[120]
				2	24957734
				6	49435060
				1	53583277
				7	89641870
				8	81607417
				14	29307082
				1	134893501
				14	4972111
				10	10075805
				22	Deleted in new
				11	47129056
				1	124006975
				29	24755455
				11	10016821
				7	85654275
				20	16014266
				10	31916898
				18	58657868
				28	27841642
41	Reproduction	Post natal mortality	ARS ucd 1.2	1	22172165	Schmidt et al.,[121]
				1	92690656
				2	31324969
				2	126102261
				3	27371340
				3	84524667
				3	98199831
				5	19841574
				5	99799619
				7	19942722
				7	36903448
				7	81277561
				7	107185978
				8	78770021
				8	85376624
				9	43112250
				9	43931072
				9	48561650
				9	72906935
				10	86126358
				12	31752958
				17	66210585
				18	10082613
				18	36836017
				19	20712896
				19	54944540
				22	19273289
				22	47039746
				24	18717626
				29	40844850
42	Reproduction	Calving interval	ARS-UCD1.3	1	29773499	Dias et al.,[122]
				1	140813290
				2	64117513
				3	49898786
				3	56667735
				3	61330996
				3	69568186
				3	75348501
				6	66845727
				10	12056720
				13	26079622
				13	79289045
				14	47448631
				17	2262977
				18	20429870
				18	26518052
				22	10289255
				22	14554388
				22	30656134
				26	1061267
43	Growth	Birth weight	UMD v3.1	14	21860173	Utsunomiya et al.,[123]
				14	23827476
				14	22933624
				14	22994360
				14	21656145
44	Morphological	Conformation	UMD 3.1	3	884052	Carreno et al.,[124]
				5	27026594
				5	118107006
				7	106748679
				16	20512998
				16	79307847
		Precocity		5	118107006
				14	65797644
				15	31662890
				16	20512998
				19	35871003
				23	24855113
		Muscling		1	154665801
				3	884052
				5	118107006
				7	3585801
				7	57511560
				20	39860311
				23	24855113
45	Growth	Birth weight	UMD_3.1	14	26989942	Terakado et al.,[125]
				14	23042948
		Weight gain from birth to weaning		5	51910557
				29	26655794
		Weight gain from weaning to yearling		11	4921926
		Yearling height		8	60153709
				12	45816622
				12	43294478
46	Reproduction	Calving Ease (maternal effect)	UMD3.1	1	99057788	Silva et al.,[126]
				2	126585808
				3	15551107
				3	32803123
				11	13185231
				11	53535180
				12	33719964
				12	75063175
				14	1161040
				14	25006193
				15	24163574
				16	24766742
				16	67657632
				17	63179478
				20	65226115
				23	50046534
				24	1917443
		Calving ease (Direct Effect)		3	32803123
				3	10154665
				3	15551107
				4	80549182
				6	87088076
				9	52061790
				11	53535180
				12	34222251
				14	20453785
				14	22875779
				14	23787047
				14	25006193
				17	63025682
				18	65049923
				20	21973798
				20	45812850
				23	Deleted in new
				24	1725835
47	Morphological	Body structure	UMD 3.1	1	10132101	Silva et al.,[127]
				1	62684622
				2	12714705
				2	56232987
				3	86131121
				3	87450412
				6	20546950
				7	80252145
				8	18422790
				9	5475410
				9	54753477
				9	77152740
				14	70711906
				20	26012875
				21	52027859
		Finishing precocity		1	63399323
				1	85070867
				3	86985758
				6	55815290
				11	13081389
				12	18451164
				13	16065872
				14	18060224
				16	78140123
				17	23122861
				20	28440277
				22	21703729
				23	29394321
				24	10719809
				27	30784068
				29	45470266
		Musculature		6	57681793
				7	93926701
				8	104153525
				10	23396146
				12	18451164
				13	23979782
				13	70801810
				14	70711906
				17	23398485
				18	53680825
				27	28963565
				29	45471979
	Carcass	Backfat thickness		1	153651307
				2	120501026
				6	31207792
				10	28932669
				22	47640813
		Rump fat thickness		3	97096814
				4	6340166
				7	75928252
				7	107003836
				10	7696955
				10	81111164
				20	60338604
		longissimus muscle area		9	59763294
				10	85198770
				11	1746804
				12	64077721
				13	74559669
				14	4594339
				26	46600076
				28	33563791
48	Carcass	Rib eye Area	UMD3.1	5	34236631	Junior et al.,[128]
				5	68402256
				5	73932734
				7	75691526
				7	80244622
				8	21915599
				10	92245690
				12	11738502
				20	9851666
				29	25313446		https://academic.oup.com/jas/article-abstract/94/10/4087/4702051?redirectedFrom=fulltext
		Backfat thickness		6	113587231
				8	75166977
				8	85484761
				10	54524461
				13	63904903
				16	24140277
				17	59087493
				18	5378109
				24	16958541
				24	58048473
		Hot Carcass Weight		4	49951367
				6	3711149
				6	113528630
				7	96634635
				8	106357228
				14	17968477
				14	23399641
				16	36398520
				17	10707260
				21	4913363
49	Growth	Average Daily gain	UMDv 3.1	1	52335369	Santana et al., [129]
				9	16534229
				5	106878826
				6	109826812
				29	32178565
		Dry Matter Intake		24	50040860
				9	61294093
				27	18618418
				9	65818323
				2	128727270
				19	32263044
		Feed conversion ratio		12	65168900
				6	2106525
				7	93529573
				4	68291281
				3	45663028
				3	45656867
				16	23721556
				16	23647136
		Residual Feed intake		22	48017168
				5	101403021
				2	43276979
				3	2631321
				15	61803719
50	Carcass	Longissimus muscle area		1	6379399	Silva et al., [130]
				1	4917366
				6	67651423
				7	86969299
				8	31773720
				14	78375465
				15	73340870
				15	73875899
				15	75844311
				21	21012615		https://journals.plos.org/plosone/article?id=10.1371/journal.pone.0169860#sec002
				24	48508434
				28	33558042
		Rump fat thickness		2	33497740
				2	34218808
				2	50334980
				2	105729844
				5	20989435
				6	51660588
				6	53268662
				6	53847800
				9	8309589
				13	69161580
				14	23314467
				14	23671831
				15	56359574
				15	56582638
				19	10840677
				19	31174083
				19	31869945
				20	16344260
		Backfat thickness		1	27567886
				2	98921859
				2	118945071
				7	102266008
				9	40045528
				10	41411956
				11	26889680
				11	70102529
				14	19536619
				14	21157114
				14	22802903
				14	23311887
				14	23671831
				16	71374056
				21	5990416
				29	45606371
51	Carcass	Hot carcass weight		4	97905987	Carvalho et al.,[131]
				4	102282217
				11	47541494
				19	1063363
				18	11662605
		Rib eye area		3	118051569
				10	5611190
				10	10751085
				14	67490882
				23	33308219
		Backfat thickness		8	60271906
				8	60308241
				22	11013874
		Marbling		6	24247232
				6	69128587
				21	57933338
				24	26142572
52	Growth	Average Daily gain		9	22243082	Oliveira et al.,[132]
				1	154768668
				16	30753242
				7	27213266
				3	8483986
				14	5474396
		Dry matter intake		24	32144888
				13	8353476
				9	8289451
		Feed conversion ratio		12	27483434		https://www.ncbi.nlm.nih.gov/pmc/articles/PMC4198703/
				20	36481404
				15	57726175
				18	15439562
		Feed efficiency		9	22243082
				1	21993111
				14	71178984
				2	58269224
		Residual feed intake		8	43214359
				18	14461085
				11	93483856
				21	35114366
		Maintenance efficiency		9	84375786
				14	81121971
				20	42440185
				1	153766295
				13	19222483
				1	154768668
		Efficiency of gain		10	82142690
				13	19222483
				20	58430574
				20	42440185
				28	29334918
		Partial Efficicency of growth		14	81121971
				10	27465819
				13	19222483
				26	46165651
				3	55359082
				1	19008747
		Relative Growth rate		2	63149392
				12	64114442
				12	62992292
				9	74494456
