# Supplementary material for: Genetic Foundations of Nellore Traits: A Gene Prioritization and Functional Analyses of Genome-Wide Association Study Results
Source: Preprints.org preprint supplement (doi:10.20944/preprints202408.1101.v1), 2024-08-14
Supplement: Supplementary file 3 [file Table S3.xlsx]

## Sheet: Reproduction
Table S3. Training genes for prioritization for each Trait Group
Trait Group	Keywords	Entrez Gene ID	Guild score
Reproduction	Fertility	27120	1
	Fertility	54768	0.6823
	Fertility	152015	0.6576
	Fertility	83853	0.6411
	Fertility	404672	0.6169
	Fertility	6736	0.6109
	Implantation	4318	1
	Implantation	796	0.9893
	Implantation	4313	0.9519
	Implantation	5621	0.882
	Implantation	3553	0.8806
	Implantation	7048	0.8788
	Preimplantation	1999	1
	Preimplantation	25843	0.9886
	Preimplantation	91603	0.9783
	Preimplantation	10664	0.9743
	Preimplantation	9757	0.9686
	Preimplantation	83872	0.9564
	Endometrium	4437	1
	Endometrium	6424	0.9733
	Endometrium	54206	0.9538
	Endometrium	2956	0.9389
	Endometrium	4436	0.9301
	Endometrium	999	0.9298
	Endometrium	5728	0.9297
	Endometrium	4292	0.9281
	Endometrium	157724	0.8678
	Endometrium	123036	0.8678
	Endometrium	65977	0.8678
	Embryonic Development	23556	1
	Embryonic Development	51704	1
	Embryonic Development	3207	0.8931
	Embryonic Development	10203	0.8883
	Embryonic Development	10266	0.8767
	Embryonic Development	84002	0.8539
	Primordial Follicles	55851	1
	Primordial Follicles	643	0.9965
	Primordial Follicles	23594	0.9519
	Primordial Follicles	4998	0.9322
	Primordial Follicles	5000	0.8911
	Primordial Follicles	990	0.8888
	Uterus	7042	1
	Uterus	29893	0.8937
	Uterus	55636	0.8886
	Uterus	1528	0.8839
	Uterus	2516	0.8771
	Uterus	10395	0.8669
	Uterus	27030	0.8665
	Uterus	3209	0.8647
	Uterus	2796	0.8594
	Luteal	3350	1
	Luteal	6594	0.9103
	Luteal	2260	0.877
	Luteal	6554	0.7187
	Luteal	54107	0.6811
	Amniotic	102724334	0.9377
	Amniotic	51371	0.9388
	Amniotic	8970	0.9379
	Amniotic	4952	1
	Amniotic	3017	0.9816
	Amniotic	8339	0.9816
	Amniotic	8343	0.9816
	Amniotic	8344	0.9816
	Amniotic	8346	0.9816
	Amniotic	8347	0.9816
	Amniotic	85236	0.9622
	Amniotic	8349	0.9583
	Amniotic	3032	0.9494
	Amniotic	55612	0.9421
	Embryo	56034	0.9055
	Embryo	2042	0.886
	Embryo	286204	0.8846
	Embryo	9463	0.8835
	Ovulation	3972	1
	Ovulation	2560	0.7662
	Ovulation	9510	0.6987
	Ovulation	3566	0.6927
	Ovulation	5066	0.6883
	Ovulation	7079	0.6828
	Estrogen	1393	1
	Estrogen	55809	0.9831
	Estrogen	7252	0.9803
	Estrogen	163732	0.9202
	Estrogen	1841	0.9126
	Estrogen	81606	0.901
	Estrogen	2056	0.8992
	Estrogen	133522	0.8854
	Estrogen	79447	0.8785
	Estradiol	3586	1
	Estradiol	2488	0.8796
	Estradiol	3292	0.8108
	Estradiol	190	0.7929
	Endocrine Hormone	5967	0.678
	Lactation	5618	0.959
	Lactation	7422	0.9995
	Lactation	5469	0.9677
	Lactation	8835	0.9676
	Lactation	6776	0.9656
	Lactation	857	0.9635
	Lactation	1036	0.9627
	Lactation	2066	0.9622
	Lactation	6774	0.962
	Spermatogenesis	89876	0.7591
	Spermatogenesis	1617	0.7556
	Spermatogenesis	3972	1
	Spermatogenesis	151195	0.7935
	Spermatogenesis	340719	0.9865
	Spermatogenesis	113451	0.7968
	Testicular Hypoplasia	6497	0.7333
	Testicular Hypoplasia	51604	0.727
	Testicular Hypoplasia	8813	0.7365
	Testicular Hypoplasia	50814	0.7499
	Testicular Hypoplasia	6535	0.7451
	Testicular Hypoplasia	1144	1
	Testicular Hypoplasia	9791	0.7546
	Testicular Hypoplasia	2736	0.8156
	Testicular Hypoplasia	1134	0.8074
	Testicular Hypoplasia	1717	0.7884
	Testicular Hypoplasia	8818	0.7661
	Testicular Hypoplasia	124997	0.7637
	Testicular Hypoplasia	4322	0.7591
	Testes	93659	0.6717
	Testes	94115	0.6717
	Testis	146852	0.7289
	Testis	4901	0.6923
	Testis	5992	0.6915
	Mammary Glands	6364	0.9766
	Mammary Glands	7057	0.9651
	Mammary Glands	1474	0.953
	Mammary Glands	4046	0.9509
	Mammary Glands	9902	0.9429
	Mammary Glands	7031	0.9342
	Mammary Glands	5889	0.934
	Pregnancy	7043	0.6072
	Oocyte	23318	1
	Oocyte	7784	0.7718
	Oocyte	10566	0.761
	Oocyte	1618	0.7594
	Oocyte	2185	0.7479
	Oocyte	9319	0.7452
	Oocyte	26271	0.7446
	Fetus	7432	1
	Fetus	4624	0.9952
	Fetus	3135	0.995
	Fetus	2050	0.9896
	Fetus	3620	0.9874
	Fetus	2733	0.9867
	Fetus	2632	0.9853
	Zygote	10636	1
	Zygote	79816	0.9752
	Zygote	108	0.9736
	Zygote	111	0.9238
	Ovary	3976	1
	Ovary	3977	1
	Ovary	54947	0.6179
	Ovary	6440	0.6081
	Ovary	26580	0.6049
	Cervical Mucosa	9355	0.8865
	Cervical Mucosa	2252	0.8677
	Cervical Mucosa	5744	0.8485
	Cervical Mucosa	2626	0.7831
	Cervical Mucosa	7049	0.7791
	Gonad	10370	0.7389
	Gonad	10018	0.7333
	Gonad	638	0.7263
	Gonad	23414	0.7247
	Antral Follicles	80169	0.8908
	Antral Follicles	80199	0.887
	Antral Follicles	5663	0.8864
	Antral Follicles	51684	0.8815
	Antral Follicles	2099	0.8782
	Antral Follicles	5290	0.8751
	Pre-eclampsia	1636	1
	Pre-eclampsia	183	0.9447
	Pre-eclampsia	2321	0.9407
	Pre-eclampsia	5468	0.9111
	Pre-eclampsia	5054	0.9104
	Placenta	5228	1
	Placenta	1634	0.9821
	Placenta	7124	0.974
	Placenta	8022	0.955
	Sperm	124912	0.8301
	Sperm	9576	0.8256
	Sperm	79582	0.7912
	Scrotal Circumference	9409	0.9252
	Scrotal Circumference	55670	0.9232
	Scrotal Circumference	5194	0.9224
	Scrotal Circumference	5193	0.9085
	Scrotal Circumference	5189	0.8618
	Scrotal Circumference	8799	0.8389
	Scrotal	9968	1
	Scrotal	2263	0.9806
	Scrotal	27351	0.9464
	Testicular	2324	0.6276
	Testicular	7016	0.6163
	Testicular	2072	0.6134
	Spermatozoa	53340	0.8287
	Hypogonadism	415	0.6139
	Semen	57054	1
	Semen	57135	0.658

## Sheet: Carcass
Table S3. Training genes data for each grouped trait. Each worksheet shows the Trait Group, the Key-words used in GUILDify, gene identification of each gene (Entrez Gene ID) and the Guild score of each gene which shows how associated the gene is with the keyword.
Trait Group	Keywords	Entrez Gene ID	Guild score
Carcass	Longissimus muscle	10266	1
	Longissimus muscle	9312	0.9726
	Longissimus muscle	3746	0.9347
	Longissimus muscle	1144	0.8995
	Longissimus muscle	3745	0.8632
	Longissimus muscle	10203	0.8535
	Longissimus muscle	9510	0.8387
	Longissimus muscle	127495	0.8385
	Longissimus muscle	7042	0.8271
	Longissimus muscle	200539	0.8238
	Longissimus muscle	54344	0.8197
	Longissimus muscle	4922	0.8195
	Longissimus muscle	10329	0.8172
	Longissimus muscle	642658	0.8165
	Longissimus muscle	4318	0.8129
	Longissimus muscle	6334	0.8118
	Longissimus muscle	2660	0.8112
	Longissimus muscle	5261	0.8104
	Longissimus muscle	4624	0.809
	Backfat thickness	2018	1
	Backfat thickness	2074	0.9392
	Backfat thickness	23017	0.9335
	Backfat thickness	6424	0.9284
	Backfat thickness	84665	0.9275
	Backfat thickness	1410	0.924
	Backfat thickness	4607	0.9111
	Backfat thickness	1161	0.9087
	Backfat thickness	4487	0.9061
	Backfat thickness	4041	0.9053
	Backfat thickness	7137	0.9035
	Backfat thickness	4089	0.9013
	Backfat thickness	7139	0.8976
	Backfat thickness	860	0.8883
	Backfat thickness	1634	0.8875
	Backfat thickness	5468	0.8855
	Backfat thickness	1441	0.8835
	Backfat thickness	6496	0.8818
	Backfat thickness	3892	0.8808
	Myosin	79083	1
	Myosin	5874	0.7402
	Myosin	25924	0.7248
	Myosin	5865	0.6433
	Myosin	5873	0.6385
	Myosin	10565	0.6348
	Myosin	53632	0.634
	Myosin	128239	0.6322
	Myosin	4619	0.6304
	Myosin	4644	0.6146
	Myosin	4650	0.6144
	Myosin	4620	0.6136
	Myosin	4621	0.6096
	Myosin	51422	0.6094
	Myosin	5571	0.6064
	Myosin	4622	0.603
	Myosin	4626	0.603
	Actin	58480	1
	Actin	116984	0.9851
	Actin	139741	0.9714
	Actin	137735	0.9689
	Actin	1236	0.9415
	Actin	148170	0.9245
	Actin	1946	0.9157
	Actin	10435	0.9148
	Actin	4810	0.9146
	Actin	83715	0.9087
	Actin	55909	0.9033
	Actin	9826	0.9025
	Actin	84448	0.9016
	Actin	23092	0.901
	Actin	5365	0.9007
	Actin	3778	0.9004
	Actin	4868	0.8992
	Actin	4625	0.8599
	Actin	23433	0.8598
	Fibroblast	23765	1
	Fibroblast	2251	0.9049
	Fibroblast	2254	0.9049
	Fibroblast	2250	0.8755
	Fibroblast	131405	0.8654
	Fibroblast	3605	0.8432
	Fibroblast	2252	0.8296
	Fibroblast	56034	0.8234
	Fibroblast	3456	0.7889
	Fibroblast	2246	0.7784
	Fibroblast	6347	0.7759
	Fibroblast	2247	0.774
	Fibroblast	5440	0.7668
	Fibroblast	7049	0.7658
	Fibroblast	1490	0.7658
	Fibroblast	7057	0.7625
	Fibroblast	25970	0.7622
	Fibroblast	2263	0.7562
	Fibroblast	2248	0.7546
	Tissue deposition	5154	0.7559
	Tissue deposition	5274	1
	Tissue deposition	7077	0.83
	Tissue deposition	5327	0.8293
	Tissue deposition	4322	0.8233
	Tissue deposition	63924	0.7768
	Tissue deposition	1179	0.7584
	Tissue deposition	120425	0.7575
	Tissue deposition	8736	0.7498
	Tissue deposition	6289	0.7486
	Tissue deposition	29914	0.7428
	Tissue deposition	1134	0.7408
	Tissue deposition	55151	0.7342
	Tissue deposition	715	0.7317
	Tissue deposition	4314	0.7299
	Tissue deposition	56938	0.7283
	Fat deposition	4481	1
	Fat deposition	9445	0.9697
	Fat deposition	1296	0.9337
	Fat deposition	3162	0.8994
	Fat deposition	335	0.8912
	Fat deposition	5664	0.8661
	Fat deposition	5663	0.8553
	Fat deposition	351	0.8553
	Fat deposition	57817	0.8528
	Fat deposition	2243	0.8499
	Fat deposition	84823	0.8441
	Fat deposition	4000	0.8426
	Fat deposition	2266	0.8411
	Fat deposition	5621	0.8351
	Fat deposition	9270	0.8322
	Fat deposition	5159	0.8318
	Fat deposition	56172	0.8316
	Fat deposition	55723	0.8274
	Muscle	776	0.8086
	Muscle	796	0.8037
	Muscle	51098	0.8233
	Muscle	3209	0.8226
	Muscle	10335	0.8078
	Muscle	4618	0.8033
	Muscle	56203	0.8062
	Muscle	3756	0.8071
	Subcutaneous fat	3586	0.7597
	Subcutaneous fat	1230	0.6566
	Subcutaneous fat	1149	0.6413
	Subcutaneous fat	10559	0.6365
	Subcutaneous fat	4313	0.6324
	Subcutaneous fat	3592	0.6316
	Subcutaneous fat	2706	0.6285
	Subcutaneous fat	1146	0.6254
	Subcutaneous fat	4323	0.6215
	Subcutaneous fat	6497	0.621
	Subcutaneous fat	26580	0.6159
	Subcutaneous fat	5745	0.6139
	Subcutaneous fat	7040	0.6105
	Subcutaneous fat	5155	0.6099
	Subcutaneous fat	51752	0.6063
	Subcutaneous fat	90	0.6046
	Biceps femoris	4010	1
	Biceps femoris	1674	0.9998
	Biceps femoris	5339	0.8678
	Biceps femoris	4534	0.768
	Biceps femoris	81493	0.6415
	Skeletal muscle	3231	0.8161
	Skeletal muscle	3207	0.9612
	Skeletal muscle	3214	0.9271
	Skeletal muscle	3218	0.9271
	Skeletal muscle	3373	0.8951
	Skeletal muscle	7058	0.8747
	Skeletal muscle	4211	0.8465
	Skeletal muscle	1280	0.8355
	Skeletal muscle	3570	0.7941
	Skeletal muscle	3239	0.8152
	Carcass weight	27249	1
	Carcass weight	9409	0.9439
	Carcass weight	5194	0.9419
	Carcass weight	5193	0.9325
	Carcass weight	25974	0.9118
	Carcass weight	55670	0.898
	Carcass weight	10716	0.897
	Carcass weight	5189	0.8957
	Carcass weight	8799	0.8829
	Carcass weight	144568	0.8763
	Carcass weight	54982	0.8722
	Carcass weight	3575	0.8719
	Carcass weight	8625	0.8709
	Carcass weight	8504	0.8698
	Carcass weight	1763	0.8691
	Carcass weight	2056	0.8689
	Carcass weight	359	0.868
	Carcass weight	3827	0.8649
	Carcass weight	5824	0.8644
	Carcass weight	5828	0.8642
	Carcass weight	570	0.8636
	Carcass weight	5020	0.8635
	Carcass weight	1716	0.8626
	Carcass weight	8540	0.8606
	Carcass weight	6535	0.8602
	Carcass weight	9791	0.8585
	Carcass weight	22845	0.8585
	Carcass weight	114882	0.8584
	Carcass weight	54901	0.8583
	Carcass weight	1355	0.8579
	Carcass weight	55706	0.8562
	Carcass weight	7809	0.8562
	Carcass weight	5195	0.8561
	Carcass weight	323	0.8554

## Sheet: Growth
Group Trait	Keywords	Entrez Gene ID	Guild score
Growth	Body weight	10266	1
	Body weight	1144	0.876
	Body weight	192670	0.8758
	Body weight	23585	0.869
	Body weight	25914	0.8678
	Body weight	6869	0.866
	Body weight	144568	0.8641
	Body weight	79611	0.8636
	Body weight	123811	0.8525
	Body weight	85378	0.8522
	Birth weight	27249	1
	Birth weight	9409	0.9494
	Birth weight	5194	0.9481
	Birth weight	3586	0.9479
	Birth weight	5193	0.9389
	Birth weight	25974	0.9167
	Birth weight	9509	0.9114
	Birth weight	10716	0.9044
	Birth weight	5189	0.9041
	Birth weight	4318	0.9037
	Birth weight	3543	0.8982
	Birth weight	7042	0.8968
	Birth weight	4593	0.8927
	Birth weight	2184	0.8318
	Adult weight	7809	0.968
	Adult weight	9607	0.9288
	Adult weight	6736	0.9226
	Adult weight	1421	0.9138
	Adult weight	2044	0.9036
	Adult weight	27102	0.9008
	Adult weight	8799	0.8926
	Adult weight	8110	0.8912
	Adult weight	6497	0.8868
	Adult weight	1902	0.8896
	Weight gain	55670	0.899
	Weight gain	8625	0.8753
	Weight gain	3575	0.8729
	Weight gain	54982	0.8727
	Weight gain	1763	0.8718
	Weight gain	5020	0.8712
	Weight gain	2056	0.8709
	Weight gain	8504	0.8699
	Weight gain	359	0.8688
	Body size	10844	0.9196
	Body size	1755	0.9376
	Body size	653509	0.9376
	Body size	49856	0.9267
	Body size	285331	0.9263
	Body size	26005	0.9252
	Body size	374654	0.925
	Body size	6608	0.9233
	Average daily gain	158866	0.8209
	Average daily gain	51114	0.8156
	Average daily gain	5828	0.8152
	Average daily gain	1716	0.8149
	Average daily gain	8540	0.8137
	Average daily gain	1355	0.8134
	Average daily gain	7552	0.8105
	Average daily gain	114882	0.8095
	Average daily gain	9791	0.8088
	Body weight gain	9657	0.8481
	Body weight gain	796	0.8451
	Body weight gain	23354	0.8447
	Body weight gain	55095	0.8443
	Body weight gain	54930	0.8439
	Body weight gain	55142	0.8423
	Body weight gain	51134	0.8421
	Body weight gain	121441	0.842
	Body weight gain	22994	0.8413
	Body weight gain	54801	0.8406
	Body weight gain	6535	0.7931
	Body weight gain	22845	0.7926
	Body weight gain	6440	0.7923
	Body weight gain	10195	0.7909
	Body weight gain	5994	0.7892
	Body weight gain	5195	0.7886
	Body weight gain	55559	0.8398
	Body weight gain	192669	0.8393
	Body weight gain	93323	0.8392
	Body weight gain	28981	0.8392
	Stature	3373	1
	Stature	4322	0.9374
	Stature	1717	0.9276
	Stature	8022	0.9213
	Stature	1513	0.917
	Stature	2178	0.905
	Stature	2187	0.8999
	Stature	1280	0.8902
	Stature	10560	0.8887
	Stature	715	0.8882
	Stature	2188	0.8846
	Growth	51141	0.7878
	Growth	8443	0.787
	Growth	242	0.7863
	Growth	55706	0.7839
	Growth	6584	0.7837
	Growth	4705	0.783
	Growth	4726	0.7821
	Growth	6834	0.7815
	Adipose Tissue	5274	1
	Adipose Tissue	7077	0.8927
	Adipose Tissue	63924	0.8442
	Adipose Tissue	5327	0.8313
	Adipose Tissue	1179	0.821
	Adipose Tissue	2254	0.8183
	Adipose Tissue	120425	0.8149
	Adipose Tissue	1134	0.8023
	Adipose Tissue	8736	0.7999
	Adipose Tissue	7049	0.7979
	Adipose Tissue	642658	0.7876
	Dry matter intake	6564	1
	Dry matter intake	3952	0.9946
	Dry matter intake	6565	0.9538
	Dry matter intake	1807	0.9518
	Dry matter intake	8890	0.9367
	Dry matter intake	83696	0.9327
	Dry matter intake	83700	0.9321
	Dry matter intake	1967	0.932
	Dry matter intake	8893	0.9301
	Dry matter intake	3953	0.9283
	Metabolism	7252	1
	Metabolism	3972	1
	Metabolism	2488	1
	Metabolism	122876	1
	Metabolism	170589	0.81
	Metabolism	54995	0.7224
	Metabolism	221955	0.6849
	Metabolism	3594	0.6808
	Metabolism	55532	0.656
	Metabolism	3592	0.6558
	Mature body weight	389421	1
	Mature body weight	131405	0.8912
	Mature body weight	2622	0.7931
	Mature body weight	23112	0.7855
	Mature body weight	7840	0.7851
	Mature body weight	56912	0.7823
	Mature body weight	9786	0.7823
	Mature body weight	163786	0.7808
	Mature body weight	51308	0.7801
	Mature body weight	79441	0.7796
	Maternal ability	8382	0.9889
	Maternal ability	3556	0.9695
	Maternal ability	5972	0.9668
	Maternal ability	92241	0.9652
	Maternal ability	1828	0.9635
	Maternal ability	9863	0.9597
	Maternal ability	5066	0.9576
	Maternal ability	966	0.9546
	Maternal ability	51531	0.9535
	Maternal ability	150684	0.9525
	feed conversion	27072	1
	feed conversion	64601	0.9996
	feed conversion	1841	0.9976
	feed conversion	8529	0.9936
	feed conversion	57617	0.9875
	feed conversion	79644	0.9853
	feed conversion	65082	0.983
	feed conversion	378708	0.9579
	feed conversion	89978	0.9544
	feed conversion	64151	0.9501
	feed efficiency	79727	1
	feed efficiency	2941	0.9068
	feed efficiency	64848	0.8965
	feed efficiency	6733	0.8907
	feed efficiency	6732	0.8853
	feed efficiency	25962	0.8768
	feed efficiency	84271	0.8706
	feed efficiency	9589	0.8699
	feed efficiency	10714	0.8697
	feed efficiency	9939	0.8687
	feed efficiency	55270	0.8668
	dry matter	2074	0.9037
	dry matter	8891	0.8999
	dry matter	2018	0.8925
	dry matter	8892	0.8867
	dry matter	79991	0.8808
	dry matter	6663	0.8795
	dry matter	5663	0.8769
	dry matter	1161	0.8758
	dry matter	5654	0.8745
	milk composition	8526	1
	milk composition	57492	0.9639
	milk composition	8289	0.9565
	milk composition	23399	0.9494
	milk composition	6604	0.9397
	milk composition	86	0.9296
	milk composition	55274	0.9197
	milk composition	6595	0.9102
	milk composition	8193	0.9037
	milk composition	2905	0.9006
	Muscle development	4211	0.9062
	Muscle development	94137	0.9051
	Muscle development	221833	0.9051
	Muscle development	9856	0.9035
	Muscle development	2736	0.9034
	Muscle development	54344	0.9024
	Muscle development	10505	0.9024
	Muscle development	116443	0.9024
	Muscle development	2535	0.9024
	Muscle development	51450	0.9017

## Sheet: Morphological
Group Trait	Keywords	Entrez Gene ID	Guild score
Morphological	Body development	267004	1
	Body development	3207	0.9645
	Body development	10266	0.9624
	Body development	10203	0.9444
	Body development	389421	0.9253
	Body development	23556	0.9089
	Body development	51704	0.9089
	Body development	27120	0.9089
	Body development	3218	0.9063
	Body development	3214	0.9063
	Body development	79611	0.8966
	Body development	84002	0.8857
	Body development	2018	0.8851
	Body development	3570	0.8848
	Muscle mass	9312	0.8959
	Muscle mass	3746	0.8603
	Muscle mass	1144	0.8301
	Muscle mass	3745	0.814
	Muscle mass	796	0.7844
	Muscle mass	127495	0.7816
	Muscle mass	9510	0.7813
	Muscle mass	7042	0.7749
	Muscle mass	200539	0.7694
	Muscle mass	54344	0.7677
	Muscle mass	10329	0.7643
	Muscle mass	642658	0.7636
	Muscle mass	4318	0.7627
	Subcutaneous fat	3586	0.7597
	Subcutaneous fat	63924	0.725
	Subcutaneous fat	1230	0.6566
	Subcutaneous fat	1149	0.6413
	Subcutaneous fat	10559	0.6365
	Subcutaneous fat	4313	0.6324
	Subcutaneous fat	3592	0.6316
	Subcutaneous fat	2706	0.6285
	Subcutaneous fat	1146	0.6254
	Subcutaneous fat	4323	0.6215
	Subcutaneous fat	6497	0.621
	Subcutaneous fat	26580	0.6159
	Subcutaneous fat	5745	0.6139
	Subcutaneous fat	29126	0.9942
	Subcutaneous fat	4680	0.9719
	Subcutaneous fat	6351	0.1402
	Subcutaneous fat	9560	0.1402
	Subcutaneous fat	388372	0.1402
	Conformational structure	5133	1
	Conformational structure	27249	1
	Conformational structure	3208	0.996
	Conformational structure	3439	0.9901
	Conformational structure	1807	0.9817
	Conformational structure	79660	0.9776
	Conformational structure	54995	0.9775
	Conformational structure	6010	0.9774
	Conformational structure	383	0.976
	Conformational structure	8693	0.9744
	Conformational structure	100528030	0.9744
	Conformational structure	7180	0.9743
	Conformational structure	3553	0.9739
	Conformational structure	1088	0.9705
	Conformational structure	3447	0.9584
	Conformational structure	374383	0.939
	Conformational structure	9607	0.936
	Conformational structure	1087	0.9331
	Conformational structure	1215	0.9259
	Conformational structure	53833	0.9166
	Conformational structure	4671	0.9098
	Conformational structure	25974	0.893
	Conformational structure	259197	0.8802
	Conformational structure	3562	0.8696
	Adipose tissue	5274	1
	Adipose tissue	7077	0.8927
	Adipose tissue	4322	0.8628
	Adipose tissue	5327	0.8313
	Adipose tissue	1179	0.821
	Adipose tissue	2254	0.8183
	Adipose tissue	120425	0.8149
	Adipose tissue	1134	0.8023
	Adipose tissue	8736	0.7999
	Adipose tissue	7049	0.7979
	Adipose tissue	55151	0.7829
	Adipose tissue	715	0.7817
	Body depth	6869	0.9388
	Body depth	192670	0.9358
	Body depth	25914	0.9279
	Body depth	23585	0.9279
	Body depth	1755	0.9265
	Body depth	653509	0.9265
	Body depth	85378	0.9092
	Body depth	123811	0.9082
	Body depth	49856	0.9037
	Body depth	285331	0.903
	Body depth	26005	0.9018
	Body depth	374654	0.8995
	Body depth	9657	0.897
	Feet and leg	64327	1
	Feet and leg	102	0.9614
	Feet and leg	84314	0.9448
	Feet and leg	5376	0.9241
	Feet and leg	6305	0.9232
	Feet and leg	7124	0.9136
	Feet and leg	2697	0.9117
	Feet and leg	51715	0.9036
	Feet and leg	8898	0.9023
	Feet and leg	4621	0.9012
	Feet and leg	79977	0.8951
	Feet and leg	81846	0.8918
	Tendon	9409	0.9726
	Tendon	5194	0.9714
	Tendon	5193	0.9567
	Tendon	4547	0.9352
	Tendon	55670	0.8971
	Tendon	5189	0.8849
	Tendon	112	0.8821
	Tendon	8799	0.8699
	Tendon	5191	0.8669
	Tendon	5828	0.8483
	Tendon	64102	0.8452
	Tendon	8504	0.834
	Tendon	5824	0.8271
	Tendon	5192	0.8184
	Joints	3587	1
	Joints	3588	1
	Mobility aplomb	919	1
	Mobility aplomb	5697	0.9978
	Mobility aplomb	242	0.9922
	Mobility aplomb	7535	0.9673
	Mobility aplomb	7040	0.9637
	Mobility aplomb	23529	0.9575
	Mobility aplomb	2263	0.9564
	Mobility aplomb	999	0.9559
	Mobility aplomb	4000	0.9551
	Mobility aplomb	4089	0.9511
	Mobility aplomb	3691	0.9508
	Mobility aplomb	6399	0.9493
	Mobility aplomb	2074	0.9483
	Mobility aplomb	90	0.9478
	Osteogenic differentiation	131405	0.9108
	Osteogenic differentiation	140685	0.8444
	Osteogenic differentiation	2488	0.8301
	Osteogenic differentiation	3972	0.8301
	Osteogenic differentiation	5228	0.8173
	Osteogenic differentiation	8828	0.8173
	Osteogenic differentiation	29841	0.8142
	Osteogenic differentiation	5017	0.8124
	Osteogenic differentiation	5455	0.8091
	Osteogenic differentiation	1946	0.8089
	Osteogenic differentiation	6348	0.808
	Osteogenic differentiation	9355	0.8079
	Osteogenic differentiation	8809	0.8072
	Osteogenic differentiation	63973	0.8023
	Osteogenic differentiation	8022	0.8021
	Osteogenic differentiation	284358	0.7999
	Osteogenic differentiation	26468	0.7968
	Articular cartilage	3373	1
	Articular cartilage	176	0.947
	Articular cartilage	2251	0.8424
	Articular cartilage	3569	0.8002
	Articular cartilage	1280	0.7971
	Articular cartilage	7057	0.7917
	Articular cartilage	4060	0.7519
	Articular cartilage	650	0.7458
	Articular cartilage	3756	0.7429
	Articular cartilage	4314	0.7412
	Articular cartilage	1294	0.7257
	Articular cartilage	1490	0.725
	Fat deposition	4481	1
	Fat deposition	9445	0.9697
	Fat deposition	56034	0.9525
	Fat deposition	1296	0.9337
	Fat deposition	3162	0.8994
	Fat deposition	335	0.8912
	Fat deposition	5664	0.8661
	Fat deposition	5663	0.8553
	Fat deposition	351	0.8553
	Fat deposition	57817	0.8528
	Fat deposition	2243	0.8499
	Fat deposition	84823	0.8441
	Fat deposition	2266	0.8411
	Fat deposition	29914	0.8409
	Foot angle	10558	0.9919
	Foot angle	7043	0.9916
	Foot angle	51114	0.9852
	Foot angle	2911	0.9756
	Foot angle	5420	0.9655
	Foot angle	7046	0.9546
	Foot angle	5727	0.9545
	Foot angle	1717	0.9528
	Foot angle	5190	0.9492
	Foot angle	858	0.9445
	Foot angle	3239	0.9423
	Foot angle	857	0.9418
	Foot angle	2131	0.9415
	Foot angle	3209	0.941
	Foot angle	5159	0.9405
	Foot angle	2737	0.9379
	Foot angle	9569	0.9364
	Foot angle	7048	0.9354
	Foot angle	7010	0.9335
	Foot angle	5771	0.9333
	Foot angle	5743	0.9327
