# Supplementary material for: Genetic Foundations of Nellore Traits: A Gene Prioritization and Functional Analyses of Genome-Wide Association Study Results
Source: Preprints.org preprint supplement (doi:10.20944/preprints202408.1101.v1), 2024-08-14
Supplement: Supplementary file 4 [file Table S4.xlsx]

## Sheet: Sheet1
Table S4. Prioritized Gene List for each Trait Group . Each worksheet represents the prioritized gene in each trait group along with gene identification (i.e., GeneSymbol, GeneId), average score, over-all pvalue.
Trait Groups	Rank	GeneSymbol	GeneId	Average.Score	Overall.pValue
Reproduction	1	GFRA4	64096	0.532146	0.0042153
	2	RFWD3	55159	0.617228	0.00468521
	3	SERTAD2	9792	0.5936	0.00762109
	4	KIZ	55857	0.467492	0.0210006
	5	REM2	161253	0.543075	0.0358999
	6	ANKRD34B	340120	0.208956	0.226025
Sexual Precocity	1	ACSM4	341392	0.279468	0.150547
	2	ANKRD34B	340120	0.208956	0.217741

## Sheet: Sheet2
Table S4. Prioritized Gene List for each Trait Group . Each worksheet represents the prioritized gene in each trait group along with gene identification (i.e., GeneSymbol, GeneId), average score, over-all pvalue.
Trait Groups	Rank	GeneSymbol	GeneId	Average.Score	Overall.pValue
Carcass	1	RFWD3	55159	0.462983	0.0173267
	2	TMEM120A	83862	0.532176	0.019198
	3	MIEF2	125170	0.423627	0.0299751
	4	FOXRED2	80020	0.439717	0.0357033
	5	DUSP29	338599	0.434295	0.0385669
	6	CARHSP1	23589	0.300839	0.0737961
	7	OBI1	79596	0.322556	0.10375
	8	JOSD1	9929	0.221312	0.142924
	9	NOP58	51602	0.280253	0.166742
	10	LOXL1-AS1	100287616	0	0.545989
Meat quality	1	CARHSP1	23589	0.300839	0.0719186
	2	LOXL1-AS1	100287616	0	0.546281

## Sheet: Sheet3
Table S4. Prioritized Gene List for each Trait Group . Each worksheet represents the prioritized gene in each trait group along with gene identification (i.e., GeneSymbol, GeneId), average score, over-all pvalue.
Trait Groups	Rank	GeneSymbol	GeneId	Average.Score	Overall.pValue
Growth	1	ANKRD34B	340120	0.163196	0.141849
	2	JOSD1	9929	0.143108	0.413947
Efficiency	1	ANKRD34B	340120	0.163196	0.132791
	2	JOSD1	9929	0.143108	0.40677
