# Supplementary material for: Genetic Foundations of Nellore Traits: A Gene Prioritization and Functional Analyses of Genome-Wide Association Study Results
Source: Preprints.org preprint supplement (doi:10.20944/preprints202408.1101.v1), 2024-08-14
Supplement: Supplementary file 5 [file Table S5.xlsx]

## Sheet: Reproduction
Table S5. Significant genes identified in overrepresentation analysis for Reproduction trait
Entrez Gene Id
281938
281336
281335
282871
282023
503620
281507
618581
508016
100313203
100313460
100313205
100313342
100313149
100313434
100313177
100313446
100313206
100313341
100313123
100313278
100313444
100313191
100313482
100313427
282157
618684
281105
617851
280722
506438
407142
286806
281998
515770
618581
508016
281530
317654
407170
281530
503620
327682
507196
281387
338048
511045
280916
532953
326597
615757
281700
282360
511045
281105
281080
282255
404121
281950
512405
282144
386664
281938
531444
327680
404058
505797
515911
512913
281998
327701
327691
407229
444858
768005
512904
532865
513545
541040
503620
281258
281584
508723
618684
536944
280691
531359
539462
281511
280863
282157
618684
407171
281766
282229
282226
407170
281530
540150
327716
282434
407228
528891
520030
281229
444869
282871
101904937
286821
282134
114483298
114482497
104969408
618679
386664
281938
327681
281998
281187
286806
281336
282023
327679
281768
503620
407239
281537
507196
445423
281335
281731
114483794
326597
281530
282360
280832
407171
282276
504707
692183
280836
281080
319095
281972
282134
281950
282144
281938
539387
281912
281857
404058
281134
338048
515911
537380
281126
535530
540892
281187
317776
282660
407142
282023
538783
407239
512613
281872
509246
282229
281335
281507
407170
326597
281530
281387
534097
525416
281972
282134
512405
511224
616955
786336
539387
327680
287007
504668
282118
510814
317654
537380
535530
282660
768005
508713
282023
538783
503620
281606
281584
497029
507196
509246
618684
281507
281511
783109
338056
404185
281625
326597
281105
280960
281080
281419
286855
281972
281950
407163
287007
281134
280759
338048
511222
281998
613854
282660
286806
327696
503620
281285
508723
618684
280691
281511
281731
504305
407170
534097
282871
282134
100848815
512405
282144
281938
281187
282660
407142
525072
282023
503620
512613
281507
100313191
783109
338056
514534
407170
540150
281387
280960
517097
281229
280836
282294
282157
281125
511224
790164
282144
281938
786336
338048
282563
510814
535530
537195
317776
407142
286806
281978
282023
327679
503620
407239
281335
280691
281507
281700
280832
515700
282276
618826
287007
338048
280867
282660
407142
281976
618684
326597
280832
280960
517097
497200
512405
511224
786336
281912
281857
338048
281187
282660
282023
538783
541040
281584
281653
618684
280691
281641
281625
615757
281700
282202
282405
282321
338059
281105
280960
281985
505728
286863
286771
614151
407163
616955
407176
287007
281857
281941
327676
280759
511926
286823
327691
280867
282660
407142
508713
327696
281584
618684
550622
280691
281507
281511
281731
281700
504707
281080
281938
537380
540892
281187
282660
407142
282023
281507
326597
407229
281537
286849
102466249
102466867
281857
282641
102466248

## Sheet: Sexual Precocity
Table S5. Significant genes identified in overrepresentation analysis for Sexual precocity trait
Entrez Gene Id
540150
511045
281187
531488
507196
281938
281336
281335
618684
282157
281998
515770
618581
508016
281530
317654
281387
338048
281105
280722
506438
102466249
102466248
102466867
338048
286771
281766
407171
282229
282226
280863
618684
282157
512405
326597
386664
281700
281938
282360
531444
511045
515911
281998
327701
281105
407229
444858
768005
512904
513545
541040
281258
281584
508723
404121
618684
280691
539462
281511
511224
282870
281938
338072
444987
327716
534107
510814
535530
281187
286806
282023
692183
281229
407239
281972
281335
280691
511224
282870
281938
281093
338072
539210
444987
338048
282563
517097
282023
281229
509003
407239
101904937
618684
281972
281335
281700
287007
338048
541099
525072
281207
282412
282134
282422
317654
280867
618684
504305
511224
508373
281938
287007
280851
282563
317654
541240
692183
281285
497200
281653
618684
282412
281335
539462
281511
614360
281530
386664
281938
540150
327716
282434
281998
528891
520030
281187
286806
281336
282023
327679
281229
407239
281537
444869
507196
101904937
445423
286821
281335
282134
114483298
281731
281625
326597
287007
281134
338048
511222
281998
613854
282660
281105
286806
327696
281285
508723
286855
618684
281972
280691
281511
281731
326597
407229
281537
512405
511224
326597
281530
539387
287007
281387
534097
510814
317654
535530
282660
525416
768005
508713
282023
281584
507196
509246
618684
281972
282134
281511
404185
511224
790164
281938
540150
281387
338048
282563
510814
535530
537195
286806
281978
517097
282023
327679
281229
280836
282294
407239
281335
280691
282157
281938
281187
281336
281335
326597
281530
281938
282360
539387
407171
281134
338048
515911
281126
535530
281187
282660
504707
282023
692183
280836
407239
512613
509246
282229
281972
281335
282134
692183
618792
618684
512405
511224
326597
338048
281187
282660
517097
282023
541040
497200
281584
281653
618684
280691
326597
281938
338048
528891
282660
407229
512613
509246
286771
281335
280691

## Sheet: Carcass
Table S5. Significant genes identified in overrepresentation analysis for Carcass trait
Entrez Gene Id
512405
281078
281203
282657
281494
540771
281160
282125
282271
282516
281785
282405
282032
613854
327693
404114
281357
616550
537431
513971
282651
282309
281181
515773
286863
524770
282598
281451
506961
281626
281123
550622
281511
506438
286842
618164
281039
282576
281203
282646
282516
281615
613854
616550
282573
511484
520472
408016
327662
281528
281613
615849
281511
100298336
506900
280691
539556
281494
317695
615323
407238
280888
100336102
337916
404098
281983
511960
280836
281129
100139219
520472
408016
536203
317699
281946
507041
504963
281743
102466248
102465846
102465848
102465847
768320
404185
282091
281039
281700
281203
317695
317756
509936
654401
508882
535742
514201
100336102
519014
281357
280993
281983
511484
282651
281181
281781
281553
281627
615849
317699
281976
281127
281935
281637
281626
281422
281511
338056
751810
281701
407238
280888
280728
281191
280836
379045
281451
539250
282348
281203
508404
282434
781648
281567
280794
281357
513971
281983
282573
280836
281781
281080
536203
282598
281935
282160
281701
618164
282643
281989
286881
280832
281160
407238
280888
280794
515266
541305
280890
280836
408016
404136
281553
282328
282123
281422
616885
114482701
114482532
114483317
114482495
282091
541127
281160
541008
407238
508809
535742
537380
280958
281983
282388
282122
540662
513221
408005
281528
404136
282879
282123
535376
281220
526585
616115
507041
536517
404185
532836
280836
282643
281989
286881
281131
281129
281127
281128
281129
281127
281128
100299372
282091
281039
280832
281649
508142
781648
539844
282271
282644
282276
407142
282309
511083
281181
281856
286852
360194
281553
282123
281151
281935
281637
281422
286852
282598
281511
280867
282879
286821
280888
280728
280890
539250
317756
513971
280993
282470
281207
281613
379045
282123
282330
281451
535376
514374
100996942
404101
281203
510267
541127
281667
407238
537380
404098
523070
282309
327679
280836
513221
408016
327662
281090
531488
535090
444869
281946
522122
506900
618164
280691
286798
786336
281649
281494
281667
514394
767940
407238
616550
281983
514374
100996942
282871
506900
504305
540313
281203
508404
281494
281443
281160
282125
281615
519014
281357
511960
282122
281637
282871
615688
506438
286842
280802
281039
535290
282576
353354
407238
281785
508809
280794
280869
282419
280993
533011
282388
282651
281181
280836
520598
538860
327662
281090
515773
536203
613777
281626
281422
282211
281124
286842
286864
280802
404098
511422
407142
407142
281127
281128
512405
281443
282419
281983
102465124
102465126
102465125
102465129
102465123
791018
100313301
100313277
100313162
100313226
100313330
100313407
100313219
100313433
100313418
100313435
100313334
100313342
100313443
100313194
100313142
100313434
100313233
100313207
100313238
100313208
100313465
100313150
100313215
100313299
100313425
100313412
100313144
100313403
100313355
282152
514374
100996942
508882
280867
407142
281627
616115
319096
282419
282871
286798
280888
281124
506900
102466248
102465846
102465848
102465847
281443
511960
280794
504963
327662
281863
512405
282091
281700
353114
282646
510267
654401
516692
509969
508882
280794
282032
100336102
518569
616550
280993
282477
282573
512904
511484
280734
281227
281781
520598
282470
281090
281080
281989
282239
281627
282123
615849
618574
281151
286881
281220
514374
100996942
534353
281626
618389
281511
404100
286842
280691
280802
786336
281374
281387
281160
280888
280728
281687
280867
280958
280890
281191
281131
281129
281512
281090
404136
281127
281689
404103
280802
281039
281443
281785
280888
280728
280794
613854
404114
281191
407142
282203
281781
100139219
515773
281613
280716
282205
282204
281127
281637
281124
286842
404103
768320
100297617
286836
280691
615043
780933
281233
280750
516692
280794
518569
280734
281989
618574
286881
281935
618389
281743
768320
100297617
286836
535290
616871
786336
281203
281443
281160
280695
280750
781648
281785
280728
613854
327693
281357
513971
407142
533011
281181
281528
515773
281080
281613
281127
510767
281124
280691
615026
780933
281995
535290
767940
515580
616550
280993
533011
282309
281451
616800
506900
280691
615043
519935
281233
280802
281700
281203
540771
615323
767940
781648
281785
280888
280728
281357
513971
280867
282419
280993
281191
407142
281781
520598
281512
282470
286852
281090
281080
379045
281935
281637
510767
506900
280691
780933
281233
281387
281667
281443
281160
280750
529618
281567
280888
281983
407142
353112
281781
281512
282643
408016
281090
404136
515773
281989
281613
286881
282871
497620
317777
404100
100126828
616885
281078
281700
786336
281203
281443
781648
281785
282405
539459
280728
540838
404114
282419
280993
407142
507345
281781
286852
281090
531488
282205
281976
510801
281689
618164
780933
281078
541148
282032
280867
525246
280958
407142
281131
327662
282157
281511
338056
512276
790464
317695
281667
282125
541008
516692
534607
527722
282032
518569
327693
281357
280867
525246
282419
353112
280836
282643
524677
327662
286863
281989
404076
317699
618574
281151
286881
506961
282871
282105
504963
618918
615688
618389
404103
286836
618164
615043
516692
518569
280734
281989
618574
286881
618389
281743
286836
281227
281781
281151
281220
616871
281700
654401
282125
516692
537380
518569
404098
327693
280916
616550
282419
282477
523070
533451
520598
282470
282643
286852
531488
281080
281989
615849
618574
286881
281935
506961
504963
281422
550622
618389
404100
618164
404185
540313
280832
281203
282516
537380
282032
282419
280993
282573
100139219
540662
444869
281626
281131
281129
281127
281128
281700
317756
281443
281160
280888
407151
281983
281749
280836
282123
281451
281637
281626
286821
281422
317777
783109
100299372
767940
515580
327693
524677
510767
522122
506900
280691
519935
512405
282657
282125
516692
541305
282032
337916
518569
282419
533270
280734
520598
282643
408016
281989
618574
286881
281935
281637
618389
281511
282646
281387
281667
781648
404066
520497
280888
407142
327679
515773
281613
534058
280691
613811
781648
280993
513221
512405
616871
540313
317756
767940
781648
281785
317748
282419
533270
282309
513221
408016
281528
282598
615906
521633
616115
282871
536517
780933
613811
280888
280890
281946
280832
281160
282879
616885
512405
786336
282125
513971
533270
618164
281039
281078
281785
539459
519014
540838
513971
281080
281637
780933
317756
525246
280993
281983
281856
281512
408016
286881
282871
281743
286836
282643
281989
286881
281667
281160
280794
282419
280993
281127
281123
282211
281128
281701
100299372
282276
281151
514374
100996942
281039
282646
281227
286852
281935
281511
286842
535290
281203
281494
317756
338100
282516
280794
533011
282651
280836
281512
281528
281553
282330
526585
281637
100299372
327662
506900
280691
615043
519935
281700
280794
404098
327693
407142
281856
281090
615026
281995
282576
541008
280814
281615
535742
613854
281171
280993
282388
286852
281613
353106
280716
282598
281220
281637
100101492
616800
280691
281131
281129
281127
281128
280867
513221
408005
281528
282434
407238
280888
515266
281749
280836
100139219
408016
281553
281946
507041
282871
114482701
114482532
114483317
114482495
281039
281937
281374
541127
541008
327693
407151
280993
281191
281181
327662
286852
281528
404136
281935
281637
507041
281626
282160
614878
281511
782719
526221
100297753
281701
780933
281078
281937
281700
286798
281494
317756
281667
281443
280890
407142
281181
281129
281781
286852
281080
317721
535090
615849
281976
281935
281637
281422
783109
338056
280691
281667
513971
327679
281129
281127
281128
281160
529618
280836
281451
616885
510267
513971
286852
615849
616800
506900
618164
280691
615043
282573
282871
404103
780933
281743
768320
100297617
286836
281233
786336
281667
537380
282419
280993
100139219
286863
281637
100101492
506900
281781
506900
280691
615043
519935
317695
281443
281785
513221
327662
317699
786336
529618
281785
525246
280958
281181
360194
281976
281039
616871
281160
781648
508809
613854
282477
407142
281090
515773
281613
615043
780933
513971
618164
281667
327679
280888
280728
317695
317699
282576
408005
282388
513221
616742
282879
526221
281125
541008
535742
281995
281233
512405
282091
281039
540313
786336
281203
281494
317756
510267
541127
281387
281667
282125
541008
407238
282516
280794
515266
535742
537380
282032
514201
537431
513971
525246
282419
280993
533270
282573
281181
281227
281129
100139219
282470
536203
535376
281127
526585
281637
507041
281626
281511
536517
783109
338056
618164
404185
281078
281203
281667
280695
516692
282271
282644
518569
280993
407142
282573
511484
282470
282643
360194
281080
281989
281553
618574
286881
281935
281637
522122
618389
510077
783109
281701
281078
281700
280832
280794
282644
282276
404114
281357
280867
281983
407142
511716
360194
282598
281976
281151
281626
510767
615043
281233
280802
281078
535290
616871
281700
281203
317695
281667
281443
281160
407194
781648
539844
281785
280888
280728
527722
539418
280794
317748
540838
327693
404114
617439
280993
282477
407142
282573
533011
282203
281856
281781
286852
281090
515773
281080
281613
281553
280716
282239
281581
317699
282204
281976
281935
281637
504963
281422
282157
510077
281511
506900
280691
780933
539250
281233
286798
280832
281203
281494
317756
281667
281160
539844
407238
282271
282516
280728
537380
282644
100336102
337916
282276
281357
407142
282573
281749
282309
281181
280836
281856
281781
408005
286852
281528
360194
281080
281553
282879
379045
282123
281946
281637
507041
281422
615688
536517
616885
114483813
281701
281039
281700
317695
281443
281160
282125
767940
781648
539844
338100
282516
281785
282405
280728
280794
282032
281171
327693
404114
616550
280867
280958
282419
280993
407142
533011
282309
513622
281856
327662
286852
281090
281528
286863
281613
281553
280716
317699
281637
504963
550622
510677
281124
281511
510801
614151
616800
280691
615043
780933
280802
281203
281387
281443
281160
404066
280794
541305
281171
404114
281687
407142
281749
281781
352960
281090
281537
444869
282205
281127
281123
281128
281689
404103
512237
786336
407098
540150
281387
281667
767940
281567
515266
337916
525246
280958
407142
517097
281131
282309
327679
281181
280836
281129
281781
281512
520472
408005
282294
281553
282879
281946
281422
282157
526221
281125
404103
616800
506900
280691
615043
280695
508809
280794
281687
281191
282203
280716
282205
282204
281689
280691
615043
780933
281233
530116
282091
281937
286798
317695
317756
615323
540150
407238
539418
280794
407151
617439
281749
280836
281512
281090
281528
360194
281553
379045
317699
281976
281626
281123
508076
522122
790979
791011
791058
510677
506438
286842
281078
281700
281203
281667
281785
539459
280888
280794
540838
280958
281781
281080
282205
281935
281637
286842
369025
540313
353114
353354
540150
281667
282434
407238
280794
780866
541305
281751
281749
327679
509232
281181
282122
281227
408016
535090
281627
281537
444869
281946
282871
508076
286821
510677
114482701
114482532
114483317
506900
114482495
281078
281160
613854
281131
281512
280716
533876
281127
281123
280691
539250
281039
281700
540313
286798
281374
317756
537161
281667
281160
280750
282434
407238
282271
281785
280888
515266
537380
100336102
280867
280869
280958
280993
533270
281749
281181
280836
513221
404136
616742
282879
615849
281946
535376
281935
282871
510767
510801
783109
616885
281701
281233
281700
280832
100336102
537431
407142
281781
360194
282123
282598
317699
286881
510767
281422
282157
281511
281701
281078
282576
281667
781648
282516
281785
280794
317748
613854
616550
513971
511960
281781
281080
510960
282598
521633
281626
281124
281511
506900
618164
280691
615026
519935
780933
281233
280802
781811
281374
281160
280794
535742
100336102
319096
280867
281181
281129
281528
536203
281627
286849
508076
510677
281743
616885
540313
281494
317695
317756
280888
280867
280993
407142
509232
511716
100139219
520472
282470
513221
281528
317699
526585
616115
286849
114483813
281649
281494
507845
510267
281443
613811
281160
280888
280728
527722
280794
281171
281191
282477
281983
407142
281181
280836
281856
281781
281512
286852
510727
281090
528862
281613
281127
282157
281128
286842
404103
504305
281039
281667
781648
281785
281615
280993
281781
282598
281976
521633
506438
780933
282091
281039
281203
317756
281667
282125
541008
407238
282271
281785
280794
535742
537380
281357
280993
533270
281983
282573
281781
100139219
408016
281528
286863
616115
507041
282871
506438
536517
280691
281078
281700
281494
510267
281160
781648
280794
282276
280890
281181
281781
281080
281553
282205
281909
521633
281637
281422
615026
780933
281171
281781
281613
280716
540519
282348
281387
281667
281443
281160
280750
404066
280888
281171
282419
327679
281781
100139219
281689
404103
616885
286836
281937
281667
281785
539459
540838
535090
281935
286842
512405
790464
532836
280794
537380
100336102
519014
513971
511422
280993
407142
511484
511083
520472
513221
281080
615849
281637
506961
507041
281422
281443
280695
404066
282271
534607
537380
280993
282573
281781
515773
281553
280716
536517
506900
280691
281937
281203
281160
282125
338100
327693
282573
511484
281181
281512
286863
281626
510077
506438
281203
317756
281856
281781
281528
515773
526133
506900
280691
519935
280734
768320
100297617
286836
512405
280794
281080
282123
281637
281422
281511
783109
114483813
512405
282091
786336
280832
281374
281203
510267
281667
100336102
281357
511960
517097
281181
281856
280716
507041
404103
506900
280691
512405
280867
282122
100139219
513221
408005
281528
280802
780866
281191
280836
541008
535742
280958
280832
100139219
616885
540150
360194
281537
286842
338056
100884163
280814
353112
281700
281785
280888
281357
281090
616871
281667
781648
280888
280728
281781
281090
281613
281553
281637
615026
780933
540519
281078
540313
540329
527722
280958
282573
280734
507345
281781
282643
524677
360194
282294
281080
281989
536203
317699
281537
286881
530393
281935
791032
791025
791018
790979
791011
790990
791015
791058
282157
615043
281078
616871
281700
281203
281387
281667
281785
539459
534607
280728
540838
280993
282573
533011
513622
281781
281090
281080
281935
281637
510077
506900
280691
615026
506900
618164
280691
280869
280836
615498
281078
281700
280867
280958
281080
282205
281637
286842
539556
353354
282434
781648
407238
281785
280888
281615
317748
280890
[truncated: 18 more rows]

## Sheet: Meat quality 
Table S5. Significant genes identified in overrepresentation analysis for Meat quality trait
Entrez Gene Id
281131
281129
281127
281128
286852
282598
281511
407238
537380
404136
281743
286836
282646
317756
541127
407238
514201
407151
525246
533270
281983
282388
281227
513221
404136
616115
507041
281743
102465124
536517
102465123
286836
407142
281127
281128
281674
282032
286852
281743
286836
506900
618164
280691
281129
281127
281128
282646
541127
407238
537380
541305
281131
281129
281127
281511
338056
751810
281443
511960
791018
100313277
100313330
100313418
100313435
100313238
100313465
100313150
100313215
100313425
100313403
281743
768320
281039
281443
281785
613854
407142
282203
100139219
281613
281127
281637
404103
768320
100297617
286836
280691
615043
780933
281131
281129
281127
281128
281387
281667
281443
529618
281567
281983
407142
353112
281512
404136
281613
282871
497620
317777
404100
616885
281131
281129
281127
281128
282573
282871
404103
780933
281743
768320
100297617
286836
281785
282573
404076
282871
780933
281129
281127
281128
282032
525246
407142
281131
282157
281511
338056
513971
286852
616800
506900
618164
280691
615043
613811
407238
539080
282470
783109
338056
514534
280832
537380
282032
282573
100139219
540662
444869
281626
281743
768320
100297617
286836
100113475
281039
541127
327693
407151
286852
404136
281637
507041
281626
282160
614878
281511
782719
526221
100297753
780933
506900
280691
615043
519935
317695
281443
281785
513221
317699
317756
613811
407238
537380
282388
282328
616115
282871
281743
286836
281039
282646
281227
286852
281511
281700
317756
281443
407151
281983
282123
281637
281626
317777
783109
513971
618164
317695
317699
282388
513221
506900
618164
280691
404103
615026
780933
508404
540838
281131
281129
540662
281127
281128
282576
280814
613854
281171
282388
286852
281613
353106
282598
281637
616800
280691
317756
525246
281983
281512
282871
281743
286836
506900
280691
615043
519935
327693
444869
510801
281151
506900
280691
282470
783109
338056
100884163
514534
751810
282125
513971
533270
618164
407238
513971
282573
281127
281637
281626
618164
780933
281700
317756
282470
281637
281785
513971
511960
281626
506900
280691
780933
281700
282646
509969
282032
282573
512904
281227
520598
282470
282239
281627
282123
281151
534353
281626
281511
404100
280691
281039
281785
540838
513971
281637
780933
281700
286798
281494
317756
281667
281443
407142
281129
286852
317721
281637
783109
338056
280691
281443
280695
281785
613854
327693
513971
407142
281613
281127
280691
615026
780933
317695
281667
282125
527722
282032
327693
525246
353112
404076
317699
281151
282871
282105
615688
404103
286836
618164
615043
280695
615043
280832
616885
282646
281387
281667
407142
281613
534058
280691
613811
407238
281227
100139219
360194
282871
317695
510960
317699
317695
281785
317699
281637
404101
282646
281494
281667
537380
513971
100139219
281511
618164
281456
513221
506900
280691
282388
513221
280832
616885
282388
513221
616800
280691
280832
540150
616885
281512
616115
282871
281863
281700
281983
281227
282871
280832
540150
616885
281700
281494
281443
282125
280916
511960
281637
616800
506900
280691
519935
280832
281494
281626
616885
282271
514201
511960
282123
506438
281700
281667
282573
281626
282271
506900
280691
281785
513971
407142
280691
615026
780933
506900
280691
513971
618164
281227
281151
613811
281637
281667
513971
514201
507041
513971
517097
618164
615043
533270
281637
783109
286836
281387
281131
281129
281512
404136
281127
404103
282125
327693
513971
533270
282573
353106
281626
618164
281039
281494
317756
541127
281387
281667
282125
407238
537380
282032
514201
513971
525246
533270
282573
281227
281129
100139219
282470
281127
281637
507041
281626
281511
536517
783109
338056
618164
281700
280832
282644
281983
407142
360194
282598
281151
281626
615043
282576
281667
281785
613854
513971
511960
510960
282598
521633
281626
281511
506900
618164
280691
615026
519935
780933
281700
317695
281667
281443
407194
281785
527722
539418
540838
327693
617439
407142
282573
282203
286852
281613
282239
317699
281637
282157
510077
281511
506900
280691
780933
281039
317756
281667
282125
407238
282271
281785
537380
533270
281983
282573
100139219
616115
507041
282871
506438
536517
280691
280832
100139219
616885
286798
280832
281494
317756
281667
407238
282271
537380
282644
407142
282573
286852
360194
282123
281637
507041
615688
536517
616885
114483813
613854
281131
281512
533876
281127
280691
281667
280695
282271
282644
407142
282573
282470
360194
281637
510077
783109
280814
353112
281039
281700
317695
281443
282125
281785
282032
281171
327693
407142
286852
281613
317699
281637
550622
281511
510801
616800
280691
615043
780933
506900
618164
280691
540150
281387
281667
281567
525246
407142
517097
281131
281129
281512
282157
526221
404103
616800
506900
280691
615043
281494
317695
317756
407142
100139219
282470
513221
317699
616115
286849
114483813
281443
282157
780933
281700
280832
407142
360194
282123
282598
317699
282157
281511
327693
513971
506900
280691
768320
100297617
286836
506900
280691
519935
281039
281667
281785
282598
521633
506438
780933
525246
533270
281983
407142
616115
507041
281863
280814
281171
282644
281626
613854
282157
506900
280691
540150
360194
338056
100884163
281456
414349
527722
539080
282239
404076
550622
791058
100124404
513308
783109
338056
100884163
514534
404101
282152
537380
407142
282388
100139219
513221
507041
282871
281863
114482701
281700
407238
537380
281171
407142
286852
281443
280695
282271
537380
282573
536517
506900
280691
513971
517097
618164
615043
281700
282573
281637
506438
286798
317695
317756
540150
407238
539418
407151
617439
281512
360194
317699
281626
791058
506438
281667
407238
533270
286852
594846
616800
540519
281387
281667
281443
281171
100139219
404103
616885
286836
282123
281637
281511
783109
114483813
281494
281443
613811
527722
281171
281983
407142
281512
286852
281613
281127
282157
281128
404103
281387
281443
541305
281171
407142
444869
281127
281128
404103
281700
281667
281909
281637
506900
280691

## Sheet: Growth
Table S5. Significant genes identified in overrepresentation analysis for Growth trait
Entrez Gene Id
511045
280916
532953
282707
281239
282089
100313143
100313162
100313235
100313437
100313334
100313145
100313332
100313434
100313191
100313230
100313299
100313141
618581
508016
282089
281848
100140544
789501
789519
787095
100141133
540519
510899
535290
512500
534185
337927
407144
539462
540313
516598
535653
386587
537380
510583
282573
282220
444869
789631
516598
535653
386587
281768
281298
789631
281078
338072
539210
514028
534712
407219
281239
517097
408005
508025
327684
407239
539888
282089
506235
538951
789631
317659
281507
100140544
789501
789519
787095
100141133
512690
527884
615323
512500
515055
618292
506235
540313
407219
281239
407239
282089
282609
281270
540313
282416
520716
282434
407228
281239
281187
286806
282589
281768
407239
281291
539888
281537
444869
282089
538951
359716
281848
281480
114482523
114482616
281731
539250
360006
404058
539844
282271
534027
537380
281357
281187
280843
282573
692183
282220
280836
408005
508025
407239
281291
282123
282089
282229
281298
780973
789631
281507
506618
280968
790164
282416
281387
280881
767940
534712
508535
281416
514203
281239
286806
282177
517097
280836
408005
282149
282294
407239
281291
281549
789631
281507
506618
281480
504216
281239
281187
280836
615323
497205
281408
282022
281239
532663
280836
282589
415110
281731
282215
786492
386587
281408
281239
282220
514554
282089
281848
404185

## Sheet: Efficiency
Table S5. Significant genes identified in overrepresentation analysis for Efficiency trait
Entrez Gene Id
511045
280916
532953
282707
281239
282089
618581
508016
282089
281848
100313143
100313162
100313235
100313437
100313334
100313145
100313191
100313230
100313299
282220
280968
539250
281662
281507
618581
508016
509522
282149
505366
281291
510583
281124
505366
281489
281489
281489
281239
100140544
789501
789519
787095
100141133
281239
282089
281848
338072
539210
514028
534712
407219
281239
517097
408005
327684
407239
539888
282089
538951
789631
317659
281507
786492
360006
511045
281408
534712
508535
537380
281239
280916
369021
282002
532953
286844
281291
281952
506961
789631
508199
404185
540313
516598
386587
537380
510583
282220
444869
789631
540519
510899
535290
534185
407144
539462
282022
286806
407239
539369
282434
282589
516598
386587
281768
281298
789631
100140544
789501
789519
787095
100141133
281270
540313
282416
520716
282434
281239
286806
282589
281768
407239
281291
539888
281537
444869
282089
538951
359716
281848
281480
114482523
114482616
281731
282215
786492
386587
281408
281239
282220
514554
282089
281848
404185
790164
282416
281387
280881
767940
534712
508535
281416
514203
281239
286806
517097
408005
282149
407239
281291
281549
789631
281507
506618
281480
540313
407219
281239
407239
282089
539250
282215
512486
540313
281374
504216
282358
282434
282271
281416
537380
516422
281239
280843
286806
282589
281291
539369
282089
538951
281848
317659
281507
280843
327694
327684
282089
317659
615323
497205
281408
282022
281239
532663
282589
281731
286797
512486
540313
516598
541127
281387
537380
514201
281239
282162
282002
327694
281606
539369
282089
281848
281507
506618
280968
404185

## Sheet: Morphological
Table S5. Significant genes identified in overrepresentation analysis for Morphological trait
Entrez Gene Id
100313133
100313280
100313407
100313194
100313233
100313432
100313240
100313131
281387
338048
407237
539791
511045
532953
509290
280722
281762
515911
281387
282860
369024
537065
493737
282860
369024
537065
493737
282305
407237
539791
282860
369024
493737
282860
369024
493737
282860
369024
493737
282860
493737
534712
404126
767940
534712
404126
282860
369024
493737
407237
539791
282860
369024
493737
540741
327681
281361
541305
506945
520994
317696
404126
505169
281598
791000
100126230
114482705
114483508
281731
509290
282305
539387
338048
281698
327668
282860
407137
369024
493737
407171
539153
407237
539791
280863
791000
282860
369024
281405
100140544
493737
787095

## Sheet: Visual score
Table S5. Significant genes identified in overrepresentation analysis for Visual score trait
Entrez Gene Id
281387
338048
407237
539791
509290
280722
100313133
100313280
100313233
100313432
100313131
515911
281387
280891
338048
282305
407237
539791
540741
327681
281361
541305
506945
317696
505169
281598
100126230
114482705
114483508
281731
